# Supplementary material for: B–B multiple bond-mediated dinitrogen cleavage induced by carbon monoxide
Source: Royal Society of Chemistry journal article supplement (doi:10.1039/d5cc02141c), 2025-01-01
Supplement: d5cc02141c1.pdf [file d5cc02141c1.pdf]

## Supplementary Information

### B–B Multiple Bonds-Mediated Dinitrogen Cleavage Induced by Carbon Monoxide

Chunwen Pan,<sup>a</sup> Jin Hu,<sup>a</sup> Liyan Cai,<sup>a</sup> and Xuefeng Wang\*<sup>a</sup>

<sup>a</sup> School of Chemical Science and Engineering, Shanghai Key Lab of Chemical Assessment and Sustainability, Tongji University, Shanghai, 200092, China.

E-mail: xfwang@tongji.edu.cn

#### Table of Contents

|                                                                                                                                          |          |
|------------------------------------------------------------------------------------------------------------------------------------------|----------|
| <b>Experimental and theoretical methods</b>                                                                                              | <b>3</b> |
| <b>Supplementary Notes</b>                                                                                                               | <b>4</b> |
| Assignment of species <i>D</i> (BNCO) and <i>E</i> (NBCO)                                                                                | 4        |
| Reaction potential energy surface of species <i>D</i> (BNCO) and <i>E</i> (NBCO)                                                         | 4        |
| Bonding analyses of species <i>A-E</i>                                                                                                   | 4        |
| <b>References</b>                                                                                                                        | <b>6</b> |
| <b>Supplementary Figures</b>                                                                                                             | <b>7</b> |
| Fig. S1. Infrared spectra of laser-ablated <sup>10</sup> B-enriched boron atoms with 1% CO in the N <sub>2</sub> matrix.                 | 7        |
| Fig. S2. Infrared spectra of laser-ablated <sup>10</sup> B-enriched or nature boron atoms with 1% CO in the N <sub>2</sub> matrix.       | 8        |
| Fig. S3. Infrared spectra of laser-ablated <sup>10</sup> B-enriched boron atoms with 1% CO in the <sup>15</sup> N <sub>2</sub> matrix.   | 9        |
| Fig. S4. Infrared spectra of laser-ablated <sup>10</sup> B-enriched boron atoms with 1% <sup>13</sup> CO in the N <sub>2</sub> matrix.   | 10       |
| Fig. S5. Infrared spectra of laser-ablated <sup>10</sup> B-enriched boron atoms with 1% C <sup>18</sup> O in the N <sub>2</sub> matrix.  | 11       |
| Fig. S6. Infrared spectra of laser-ablated <sup>10</sup> B-enriched boron atoms with CO in isotopic nitrogen matrix.                     | 12       |
| Fig. S7. Infrared spectra of laser-ablated <sup>10</sup> B-enriched boron atoms with CO/ <sup>13</sup> CO in the N <sub>2</sub> matrix.  | 13       |
| Fig. S8. Infrared spectra of laser-ablated <sup>10</sup> B-enriched boron atoms with CO/C <sup>18</sup> O in the N <sub>2</sub> matrix.  | 14       |
| Fig. S9. Infrared spectra of laser-ablated natural boron atoms with 1% <sup>13</sup> CO in the N <sub>2</sub> matrix.                    | 15       |
| Fig. S10. Infrared spectra of laser-ablated natural boron atoms with 1% C <sup>18</sup> O in the N <sub>2</sub> matrix.                  | 15       |
| Fig. S11. Potential Energy Surface of BNBNCO from TS5.                                                                                   | 16       |
| Fig. S12. Transition state structures for the reaction from NNBBCO to ( $\eta^2$ -N <sub>2</sub> )BBCO and BNBNCO and their frequencies. | 16       |
| Fig. S13. Qualitative bonding scheme of the frontier molecular orbitals of II.                                                           | 17       |
| Fig. S14. Charges on atoms of stationary points along the isomerization process of NNBBCO to BNBNCO.                                     | 17       |
| Fig. S15. Potential energy surface for the reaction from NNBBNN to ( $\eta^2$ -N <sub>2</sub> )BBNN and BNBNN + N <sub>2</sub> .         | 18       |
| Fig. S16. Charges on B–B center of stationary points along the isomerization process of NNBBNN or NNBBCO.                                | 18       |
| Fig. S17. Potential energy surface for the reaction of NNBN with CO to form NBCO ( <i>E</i> ) and BNCO ( <i>D</i> ).                     | 18       |

|                                                                                                                                                                                                                                     |           |
|-------------------------------------------------------------------------------------------------------------------------------------------------------------------------------------------------------------------------------------|-----------|
| Fig. S18. Selected frontier molecular orbitals of NNBBCO ( <i>A</i> ). .....                                                                                                                                                        | 19        |
| Fig. S19. Selected frontier molecular orbitals of ( $\eta^2$ -N <sub>2</sub> )BBCO ( <i>B</i> ). .....                                                                                                                              | 19        |
| Fig. S20. Selected frontier molecular orbitals of BNBNCO ( <i>A</i> ). .....                                                                                                                                                        | 20        |
| Fig. S21. Plot of the deformation densities $\Delta\rho$ of BNBNCO ( $^1\Sigma$ ) taking [BNB <sup>+</sup> ] ( $^1\Sigma$ ) and [NCO <sup>-</sup> ] ( $^1\Sigma$ ) as interacting fragments. ....                                   | 20        |
| Fig. S22. Selected frontier molecular orbitals of BNCO ( <i>D</i> ). .....                                                                                                                                                          | 21        |
| Fig. S23. Selected frontier molecular orbitals of NBCO ( <i>E</i> ). .....                                                                                                                                                          | 21        |
| <b>Supplementary Tables</b> .....                                                                                                                                                                                                   | <b>22</b> |
| Table S1. Observed and calculated infrared absorptions and intensities for isotopomers of products <i>A-E</i> in the reactions of <sup>10</sup> B with CO in the N <sub>2</sub> matrix. ....                                        | 22        |
| Table S2. Comparisons between experimental and calculated vibrational frequencies and isotopic frequency ratios of products <i>A-E</i> in the reactions of boron with CO in the N <sub>2</sub> matrix. ....                         | 23        |
| Table S3. Observed and calculated infrared absorptions and intensities for isotopomers of products <i>A-E</i> in the reactions of <sup>10</sup> B with CO in the N <sub>2</sub> matrix .....                                        | 24        |
| Table S4. Observed and calculated infrared absorptions and intensities for isotopomers of products <i>A-E</i> in the reactions of <sup>10</sup> B with CO in the N <sub>2</sub> matrix. ....                                        | 25        |
| Table S5. Comparisons between experimental and calculated vibrational frequencies and isotopic frequency ratios of products <i>A-E</i> in the reactions of <sup>11</sup> B with CO in the <sup>14</sup> N <sub>2</sub> matrix. .... | 26        |
| Table S6. Orbital composition analysis on the I1 ( $^1A'$ ) complex by Natural Atomic Orbital method. ....                                                                                                                          | 27        |
| Table S7. EDA-NOCV results of I1 ( $^1A'$ ) taking BBCO ( $^1A'$ ) and N <sub>2</sub> ( $^1\Sigma_g$ ) as interacting fragments. ....                                                                                               | 28        |
| Table S8. EDA-NOCV results of I1 ( $^1A'$ ) taking BBCO and N <sub>2</sub> in the different charged states as interacting fragments. ....                                                                                           | 29        |
| Table S9. The natural charge from Natural Population Analysis throughout the generation process of BNBNCO form NNBBCO. ....                                                                                                         | 30        |
| Table S10. The natural charge from Natural Population Analysis throughout the generation process of BNB + N <sub>2</sub> form NNBBNN. ....                                                                                          | 31        |
| Table S11. Calculated bond orders given by the Mayer method and Wiberg method. ....                                                                                                                                                 | 32        |
| Table S12. Orbital composition analysis on the BNBNCO complex by Natural Atomic Orbital method. ....                                                                                                                                | 33        |
| Table S13. EDA-NOCV results of BNBNCO ( $^1\Sigma$ ) taking [BNB <sup>+</sup> ] ( $^1\Sigma$ ) and [NCO <sup>-</sup> ] ( $^1\Sigma$ ) as interacting fragments. ....                                                                | 34        |
| Table S14. Experimental frequencies of boron carbonyl compounds observed in the N <sub>2</sub> matrix. ....                                                                                                                         | 34        |
| Table S15. Experimental frequencies of boron nitrides observed in the N <sub>2</sub> matrix. ....                                                                                                                                   | 35        |
| Table S16. Experimental frequencies of the products of boron atom react with CO and N <sub>2</sub> in the N <sub>2</sub> matrix. ....                                                                                               | 36        |
| Table S17. Observed and calculated (at the B3LYP/def2-TZVPP and CCSD(T)/cc-pVDZ levels) infrared absorptions for products <i>A-C</i> in the reactions of <sup>11</sup> B with CO in the N <sub>2</sub> matrix. ....                 | 37        |

## Methods

**Experimental methods.** Laser-ablated boron atoms and clusters, generated in an excess of nitrogen, were condensed at 4 K using a closed-cycle helium refrigerator (Sumitomo Heavy Industries Model SRDK-408D2). A neodymium-doped yttrium aluminum garnet (Nd:YAG) laser, operating at a fundamental wavelength of 1064 nm with a 10 Hz repetition rate and a pulse width of 10 ns, was directed onto a rotating boron target. The laser energy was meticulously adjusted within the range of 10-15 mJ/pulse. The ablated boron, enriched with  $^{10}\text{B}$  (Eagle Pitcher, 93.8%  $^{10}\text{B}$  and 6.2%  $^{11}\text{B}$ ) and natural boron (Eagle Pitcher, 80.4%  $^{11}\text{B}$  and 19.6%  $^{10}\text{B}$ ), was allowed to react with carbon monoxide (CO) and its isotopomers,  $^{13}\text{CO}$  (Cambridge Isotope Laboratories, Inc., 99 atom %),  $\text{C}^{18}\text{O}$  (Aldrich chemistry, 99 atom %), in an excess nitrogen matrix uniformly spread onto a CsI window. Isotopic  $^{15}\text{N}_2$  (Cambridge Isotope Laboratories, 98%+) and  $^{14}\text{N}_2 + ^{15}\text{N}_2$  mixtures were used in different experiments. Infrared spectra were captured at a resolution of  $0.5\text{ cm}^{-1}$  across the range between 4000 and  $400\text{ cm}^{-1}$  using a HgCdTe detector. The matrix samples underwent annealing at various temperatures, and select samples were exposed to photolysis using either a light-emitting diode (LED, 3 W) or a medium-pressure mercury arc lamp (Philips, 175 W) with the protective globe removed.

**Theoretical Methods.** All molecular structure optimizations and single-point energy calculations were executed at the B3LYP level, in conjunction with the def2-TZVPP basis set,<sup>1,2</sup> utilizing the Gaussian 09 program.<sup>3</sup> Transition states were refined using the Rational Function Optimization (RFO) method and authenticated through intrinsic reaction coordinate (IRC) calculations to ensure connectivity between the desired reactants and products. The Mayer bond order and Wiberg bond index were calculated to elucidate the bonding characteristics, employing the Multiwfn code<sup>4,5</sup> in conjunction with the Gaussian 09 program. The orbital composition was determined through a natural bond orbital (NBO) population analysis.<sup>6</sup> The orbital composition analysis was based on natural atomic orbital (NAO)<sup>7</sup> and energy decomposition analysis combined with natural orbitals for chemical valence (EDA-NOCV).<sup>8,9</sup> Visual representations of the frontier orbitals were crafted using the Multiwfn code and VMD program.<sup>10</sup>

## Supplementary Notes

### Assignment of Species **D** (BNCO) and **E** (NBCO)

The absorption bands of species **D** at 2294.5 cm<sup>-1</sup> and 1584.4 cm<sup>-1</sup> are attributed to the BNCO complex. The band at 2294.5 cm<sup>-1</sup> is indicative of the N–C–O stretching region, and its isotopic patterns derived from mixed isotopic-labeled samples (Figs. S6-S8) confirm the presence of a single NCO subunit. The band at 1584.4 cm<sup>-1</sup> demonstrates significant isotopic shifts of B-11 and N-15, yielding <sup>10</sup>B/<sup>11</sup>B and <sup>14</sup>N/<sup>15</sup>N isotopic ratios of 1.0049 and 1.0218, respectively. The absence of band splitting in the natural boron experiment (Fig. S2b) suggests the involvement of a single boron atom. Collectively, the bands' positions and isotopic signatures indicate that this group of absorptions can be ascribed to BNCO (**D**), which is predicted to possess a <sup>1</sup>A' ground state with C<sub>s</sub> symmetry at the B3LYP/def2-TZVPP level (Fig. S17). For species **E**, a new band at 2160.2 cm<sup>-1</sup> exhibits minimal isotopic shifts for N-15 and B-11 but significant shifts for C-13 and O-18 (Table S1), indicative of a terminal C–O stretching vibration. The band's 4/1 splits in the natural boron experiment at 2156.5 cm<sup>-1</sup> (<sup>11</sup>B<sup>11</sup>B) and 2160.2 cm<sup>-1</sup> (<sup>10</sup>B<sup>10</sup>B) (Fig. S2a and Table S3) support the involvement of a single boron atom. Consequently, species **E** is assigned to NBCO, which is predicted to have a <sup>1</sup>Σ ground state with linear structure at the B3LYP/def2-TZVPP level (Fig. S17). The calculated C–O stretching mode is 2174.4 cm<sup>-1</sup>, which aligns well with the experimental value of 2160.2 cm<sup>-1</sup>. The calculated B–N stretching mode of 1939.3 cm<sup>-1</sup> was not observed, possibly due to its weak intensity.

### Reaction Potential Energy Surface

For the formation of the BNCO (**D**), we have explored the reaction of NNBN (from BN + N<sub>2</sub>), which decreased under UV-vis (λ > 220 nm) coinciding with the increase of **D**, with CO molecule (Fig. S17). The reaction is exothermic by 41.6 kcal/mol at the B3LYP/def2-TZVPP level. Both BNCO (**D**) and NBCO (**E**) form during deposition and intensify at 25 K annealing. Under UV-vis (λ > 220 nm) irradiation, **E** was observed to decrease while **D** increased. This implies that complex **E** isomerizes to complex **D**, which is endothermic with a predicted energy decrease of 15.4 kcal/mol and proceeds via a transition state TS2, which is 29.2 kcal/mol higher in energy than complex **D**.

### Bonding analyses of species **A-E**

Valuable insights into the bonding scenarios within the molecules are derived from the atomic charge distribution, as depicted in Fig. 2. The least electronegative boron atoms carry, as expected, large positive charges in complex **C** (0.44 e and 1.18 e). The positive charges on the boron atoms are significantly smaller in complex **B** (0.37 e and 0.10 e) and one of them carries even a negative charge in complex **A** (0.17 e and -0.26 e). Such an atypical charge distribution was previously reported for molecules where boron acts as a Lewis acid, binding to donor ligands such as CAAC<sup>11</sup> or CO<sup>12</sup>. This distribution suggests that complexes **A** and **B** can be classified as donor-acceptor complexes of B<sub>2</sub> with the ligands CO and end-on or side-on bonded N<sub>2</sub>. Molecular orbitals of NNBBBCO (**A**) (Fig. S18) provide further clarity on the bonding nature. The doubly degenerate HOMO and HOMO-1 represent B–B π bonding orbitals, indicative of B<sub>2</sub> π → CO/N<sub>2</sub> π\* back-bonding. The HOMO-2 is a B–B σ bonding orbital, while HOMO-9 and HOMO-10 comprise CO σ → B<sub>2</sub> σ donation and NN σ → B<sub>2</sub> σ donation. This pattern suggests that singlet NNBBBCO (**A**) exhibits characteristics of a B≡B triple bond, with a Lewis structure of N≡N–B≡B–C≡O, and features B<sub>2</sub> to CO/N<sub>2</sub> back bonding via delocalization of the electron density of the two π bonds of B<sub>2</sub> into the π\* orbital of the CO or N<sub>2</sub> ligand. The C–O bonds in NNBBBCO (**A**) and (η<sup>2</sup>-N<sub>2</sub>)BBCO (**B**) are slightly elongated to 1.150 Å and 1.163 Å, respectively, compared to that in a free CO molecule (1.125 Å). In (η<sup>2</sup>-N<sub>2</sub>)BBCO (**B**), the N–N and B–B distances are substantially longer (N–N:1.263 Å, B–B:1.582 Å, respectively) compared to NNBBBCO (**A**) (N–N:1.127 Å, B–B:1.442 Å). This difference corresponds to reduced Mayer bond orders for (η<sup>2</sup>-N<sub>2</sub>)BBCO (**B**) (N–N:1.58, B–B:1.13) versus NNBBBCO (**A**) (N–N:2.10, B–B:1.94), as detailed in Table S11. The ground state of (η<sup>2</sup>-N<sub>2</sub>)BBCO was found to be a <sup>3</sup>A<sub>2</sub> ground state with C<sub>2v</sub> symmetry. The C<sub>2v</sub> triplet is 1.3 kcal/mol lower than a C<sub>2v</sub> singlet at the B3LYP/def2-TZVPP level (0.4 kcal/mol at CCSD (T)/def2-TZVPP level). The singly occupied molecular orbital

(SOMO) and SOMO-1 of triplet ( $\eta^2$ -N<sub>2</sub>)BBCO (**B**) are indicative of  $\pi^*$  bonding and  $\pi$  bonding of the B–B back-donation to the CO antibonding  $\pi^*$  orbital (Fig. S19), which are similar to the  $\pi$  back-donation of B<sub>2</sub> to CO  $\pi^*$  in the 2 $\pi$  MO of linear triplet BBCO.<sup>13</sup> Additionally, the HOMO-2 represents B–B  $\pi$  back-donation to the antibonding  $\pi^*$  orbital of side-on N<sub>2</sub>, leading to elongated N–N and B–B bond lengths. The HOMO-3 and HOMO-4 denote the N–N  $\sigma$  bond and B–B  $\sigma$  bond, while HOMO-11 represents  $\sigma$  bonding orbital of B–CO, respectively, which involve  $\pi$  bonding orbital of side-on N<sub>2</sub> and the  $\sigma$  orbital of the CO donating to B–B  $\sigma$  orbitals.

The BNBNC O (**C**) molecule possesses  $C_{\infty v}$  symmetry in the  $^1\Sigma$  ground state with linear structure. The B<sub>1</sub>–N<sub>1</sub> and B<sub>2</sub>–N<sub>2</sub> bond lengths, as calculated at the B3LYP/def-TZVPP level, are 1.359 Å and 1.349 Å (Fig. 2), respectively, which are close to those of a B=N double bond (1.39 Å).<sup>14,15</sup> The N<sub>1</sub>–B<sub>2</sub> bond (1.271 Å) potentially exhibits triple bond character, akin to the B≡N triple bond length in iminoborane (1.26 Å).<sup>15</sup> The calculated Mayer bond orders for B<sub>1</sub>–N<sub>1</sub> and B<sub>2</sub>–N<sub>2</sub> are 1.25 and 1.41, respectively, while the bond order for N<sub>1</sub>–B<sub>2</sub> is higher at 2.10 (Table S11). The molecular orbitals of BNBNC O, depicted in Fig. S20, in conjunction with the NAO method (Table S12), reveal the bonding nature. The HOMO reflects lone pair electrons on boron (B<sub>1</sub>), while the doubly degenerate HOMO-1 and HOMO-2 represent three-center-two-electrons  $\pi$  bonding across B<sub>1</sub>–N<sub>1</sub>–B<sub>2</sub>, consisting of the 2 $p$  orbitals of B<sub>1</sub> and B<sub>2</sub> and 2 $p$  orbitals of N<sub>1</sub>. This pattern continues with the doubly degenerate HOMO-3 and HOMO-4, which denote  $\pi$  bonding across N<sub>1</sub>–B<sub>2</sub>–N<sub>2</sub>, consisting of the 2 $p$  orbitals of B<sub>2</sub> and 2 $p$  orbitals of N<sub>1</sub> and N<sub>2</sub>. The N<sub>1</sub>–B<sub>2</sub> bond, situated at the overlap of four  $\pi$  bonds, corresponds to a shorter N<sub>1</sub>–B<sub>2</sub> bond length and a larger N<sub>1</sub>–B<sub>2</sub> bond order, consistent with previous results. The doubly degenerate HOMO-5 and HOMO-6 represent  $\pi$  bonding across N–C–O with calculated Mayer bond orders of 1.99 for N–C and 2.16 for C–O. The extensive  $\pi$  bonding across the linear molecule endows BNBNC O with high stability, and theoretical calculations confirm that it serves as the most stable structure among all isomers, as shown in Fig. 3. The calculated charge distribution given in Fig. 2 suggests that the bonding situation in **C** is best discussed using NBN<sup>+</sup> cation and NCO<sup>−</sup> anion as interacting fragments. The EDA-NOCV results for **C** using NBN<sup>+</sup> and NCO<sup>−</sup> as fragments give a straightforward picture of the bonds (Table S13). Fig. S21 shows the associated charge flow of the  $\sigma$  and  $\pi$  donation and the orbitals of the fragments. The largest stabilization caused by orbital interactions is due to the  $\sigma$  donation of the HOMO-1 (7 $\sigma$  MO) of the isocyanate anion into the LUMO (7 $\sigma$  MO) of NBN<sup>+</sup> cation followed by the  $\pi$  donation of the degenerate HOMO (2 $\pi$  MOs) of the isocyanate anion into the degenerate LUMO+1 (2 $\pi$  MOs) of NBN<sup>+</sup> cation.

The B–N bond lengths in BNCO (**D**) and NBCO (**E**) are 1.376 Å and 1.260 Å calculated at the B3LYP/def-TZVPP level, respectively, which are close to those of B=N double bond (1.39 Å) and B≡N triple bond length in iminoborane (1.26 Å).<sup>14,15</sup> As depicted in the molecular orbitals shown in Fig. S22, the BNCO (**D**) molecule possesses a lone pair of electrons on B (HOMO) similar to BNBNC O (**C**), as well as two equivalent  $\pi$  bonds across N–C–O (HOMO-3 and HOMO-4). The molecular orbital of NBCO (**E**) depicted in Fig. S23, which shows the degenerate HOMO, HOMO-1, and HOMO-2, clearly indicates the N≡B triple bond, comprising two  $\pi$  bonds and one  $\sigma$  bond.

## References

- 1 A. D. Becke, *J. Chem. Phys.*, 1993, **98**, 5648–5652.
- 2 C. Lee, W. Yang and R. G. Parr, *Phys. Rev. B*, 1988, **37**, 785–789.
- 3 Gaussian 09 Citation | Gaussian.com, <https://gaussian.com/g09citation/>, (accessed April 9, 2024).
- 4 T. Lu and F. Chen, *J. Comput. Chem.*, 2012, **33**, 580–592.
- 5 T. Lu, *J. Chem. Phys.*, 2024, **161**, 082503.
- 6 A. E. Reed, R. B. Weinstock and F. Weinhold, *J. Chem. Phys.*, 1985, **83**, 735–746.
- 7 E. D. Glendening, C. R. Landis and F. Weinhold, *WIREs Comput. Mol. Sci.*, 2012, **2**, 1–42.
- 8 L. Zhao, S. Pan, N. Holzmann, P. Schwerdtfeger and G. Frenking, *Chem. Rev.*, 2019, **119**, 8781–8845.
- 9 J. Andrés, P. W. Ayers, R. A. Boto, R. Carbó-Dorca, H. Chermette, J. Cioslowski, J. Contreras-García, D. L. Cooper, G. Frenking, C. Gatti, F. Heidar-Zadeh, L. Joubert, Á. Martín Pendás, E. Matito, I. Mayer, A. J. Misquitta, Y. Mo, J. Pilmé, P. L. A. Popelier, M. Rahm, E. Ramos-Cordoba, P. Salvador, W. H. E. Schwarz, S. Shahbazian, B. Silvi, M. Solà, K. Szalewicz, V. Tognetti, F. Weinhold and É.-L. Zins, *J. Comput. Chem.*, 2019, **40**, 2248–2283.
- 10 W. Humphrey, A. Dalke and K. Schulten, *J. Mol. Graph.*, 1996, **14**, 33–38.
- 11 R. Kinjo, B. Donnadieu, M. A. Celik, G. Frenking and G. Bertrand, *Science*, 2011, **333**, 610–613.
- 12 H. Braunschweig, R. D. Dewhurst, F. Hupp, M. Nutz, K. Radacki, C. W. Tate, A. Vargas and Q. Ye, *Nature*, 2015, **522**, 327–330.
- 13 M. Zhou, Z.-X. Wang, P. von Ragué Schleyer and Q. Xu, *Chem. Phys. Chem.*, 2003, **4**, 763–766.
- 14 S. Berski, Z. Latajka and A. J. Gordon, *New J. Chem.*, 2011, **35**, 89–96.
- 15 P. Paetzold, *Adv. Inorg. Chem.*, 1987, **31**, 123–170.

## Supplementary Figures

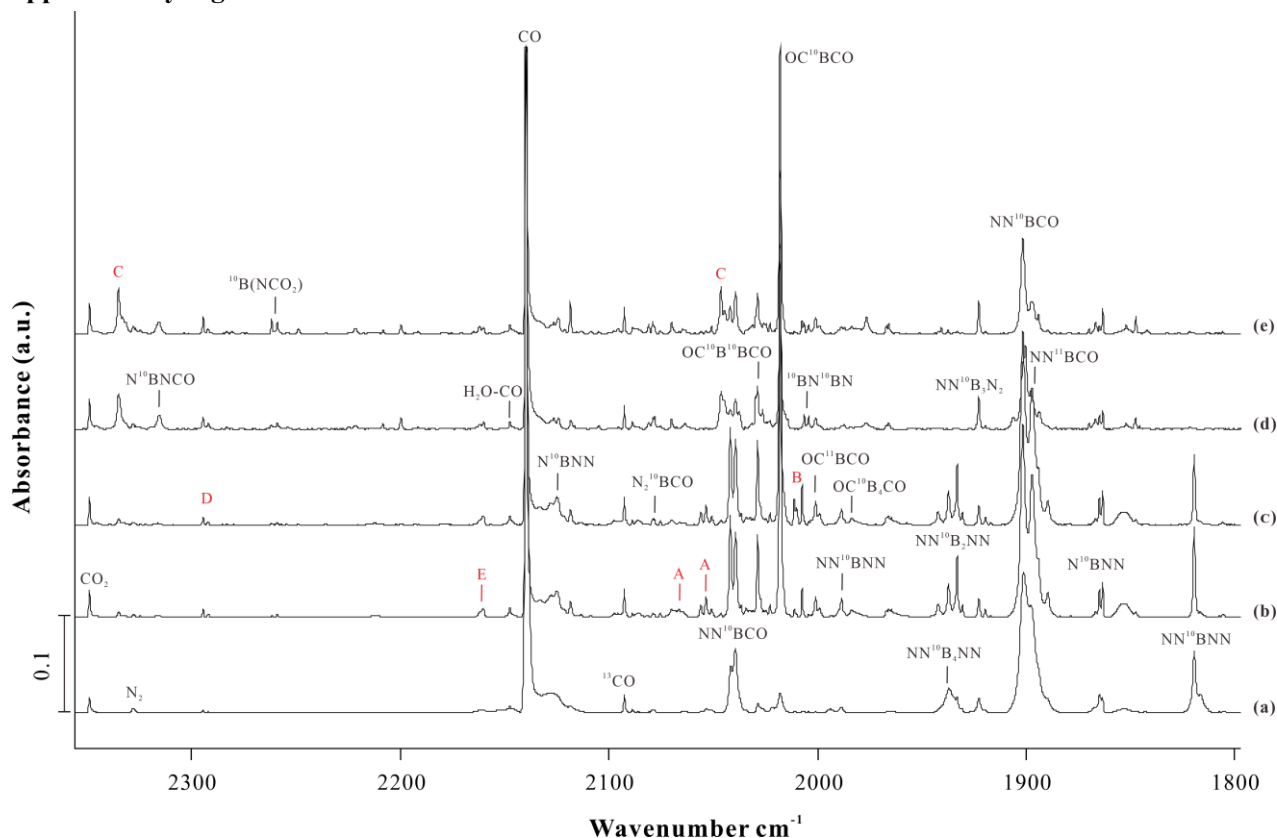

**Fig. S1a.** Infrared spectra in the 2350 cm<sup>-1</sup>-1800 cm<sup>-1</sup> region of laser-ablated <sup>10</sup>B-enriched boron atoms with 1% CO in the N<sub>2</sub> matrix. (a) co-deposition at 4 K for 1 h; (b) after annealing to 25 K; (c) after 450 nm irradiation for 10 min; (d) after >220 nm irradiation for 10 min; (e) after annealing to 30 K. [A: NNBBCO, B: ( $\eta^2$ -N<sub>2</sub>)BBCO, C: BNBBCO, D: BNCO, E: NBCO].

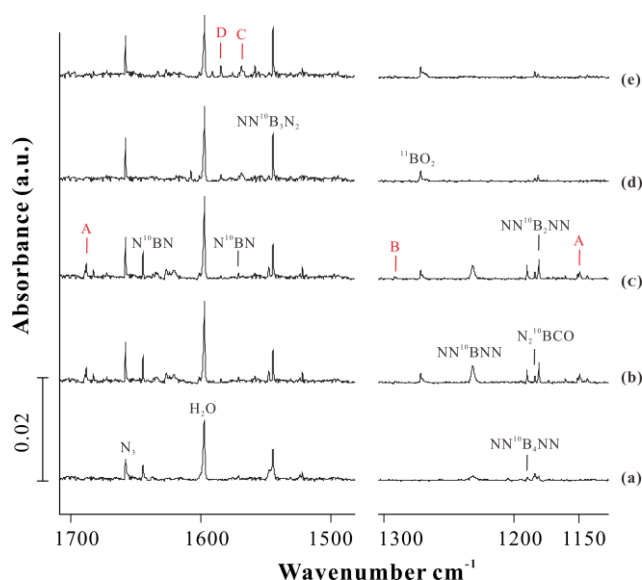

**Fig. S1b.** Infrared spectra in the 1700-1500  $\text{cm}^{-1}$ , 1300-1150  $\text{cm}^{-1}$  regions of laser-ablated  $^{10}\text{B}$ -enriched boron atoms with 1% CO in the  $\text{N}_2$  matrix. (a) co-deposition at 4 K for 1 h; (b) after annealing to 25 K; (c) after 450 nm irradiation for 10 min; (d) after  $>220$  nm irradiation for 10 min; (e) after annealing to 30 K. [A: NNBCO, B:  $(\eta^2\text{-N}_2)\text{BBCO}$ , C: BNBNCO, D: BNCO].

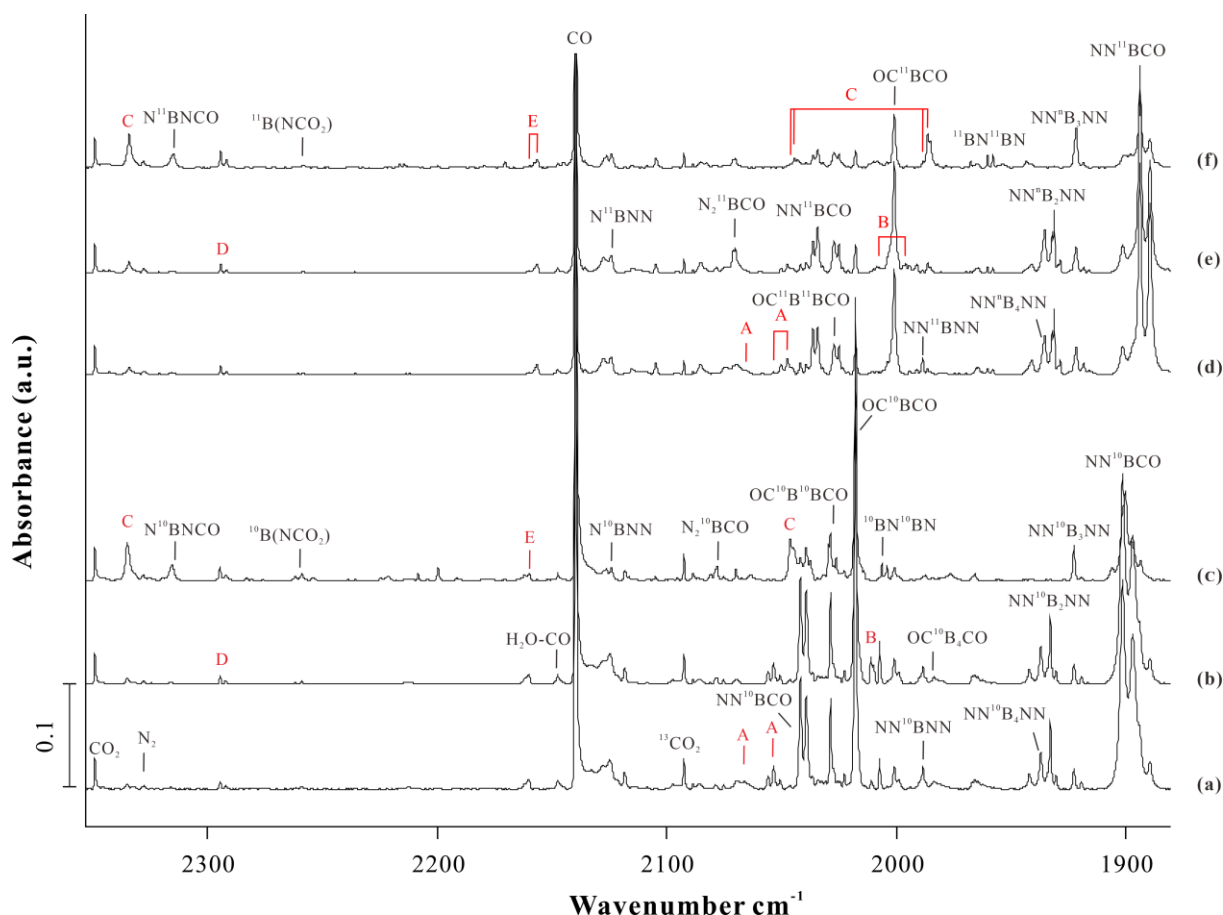

**Fig. S2a.** Infrared spectra in the 2350-1850 cm<sup>-1</sup> region of laser-ablated <sup>10</sup>B-enriched or natural boron atoms with 1% CO in the N<sub>2</sub> matrix. <sup>10</sup>B + 1% CO in N<sub>2</sub>: (a) after annealing to 25 K; (b) after 450 nm irradiation for 10 min; (c) after >220 nm irradiation for 10 min; <sup>11</sup>B + 1% CO in N<sub>2</sub>: (d) after annealing to 25 K; (e) after 450 nm irradiation for 10 min; (f) after >220 nm irradiation for 10 min. [A: NNBBBCO, B: (η<sup>2</sup>-N<sub>2</sub>)BBCO, C: BNBBCO, D: BNCO, E: NBCO].

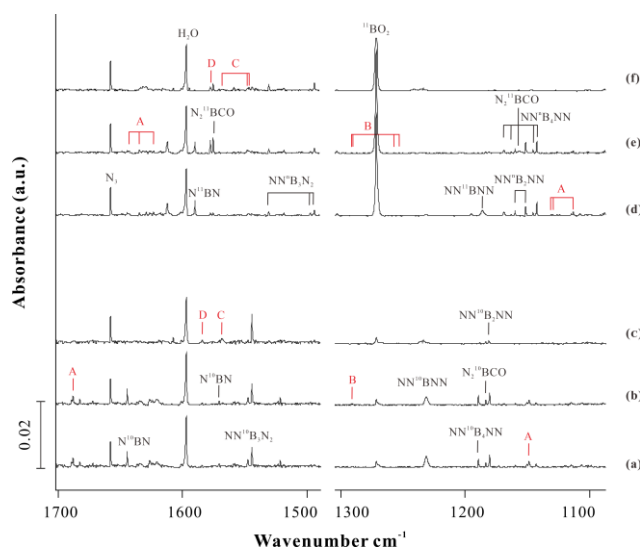

**Fig. S2b.** Infrared spectra in the 1700-1100 cm<sup>-1</sup> region of laser-ablated <sup>10</sup>B-enriched or natural boron atoms with 1% CO in the N<sub>2</sub> matrix. <sup>10</sup>B + 1% CO in N<sub>2</sub>: (a) after annealing to 25 K; (b) after 450 nm irradiation for 10 min; (c) after >220 nm irradiation for 10 min; <sup>11</sup>B + 1% CO in N<sub>2</sub>: (d) after annealing to 25 K; (e) after 450 nm irradiation for 10 min; (f) after >220 nm irradiation for 10 min. [A: NNBBBCO, B: (η<sup>2</sup>-N<sub>2</sub>)BBCO, C: BNBBCO, D: BNCO].



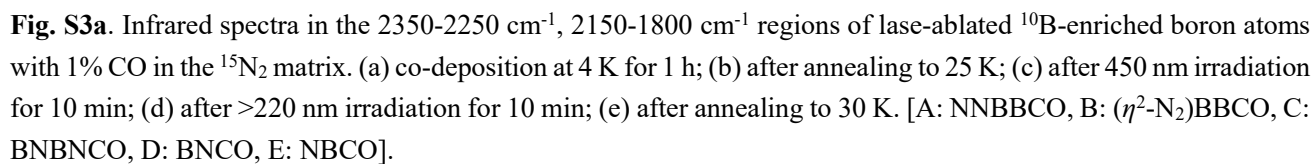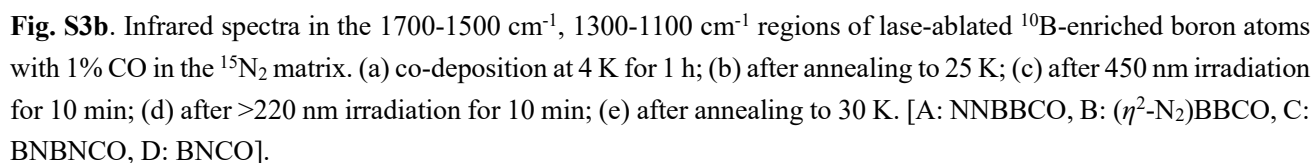

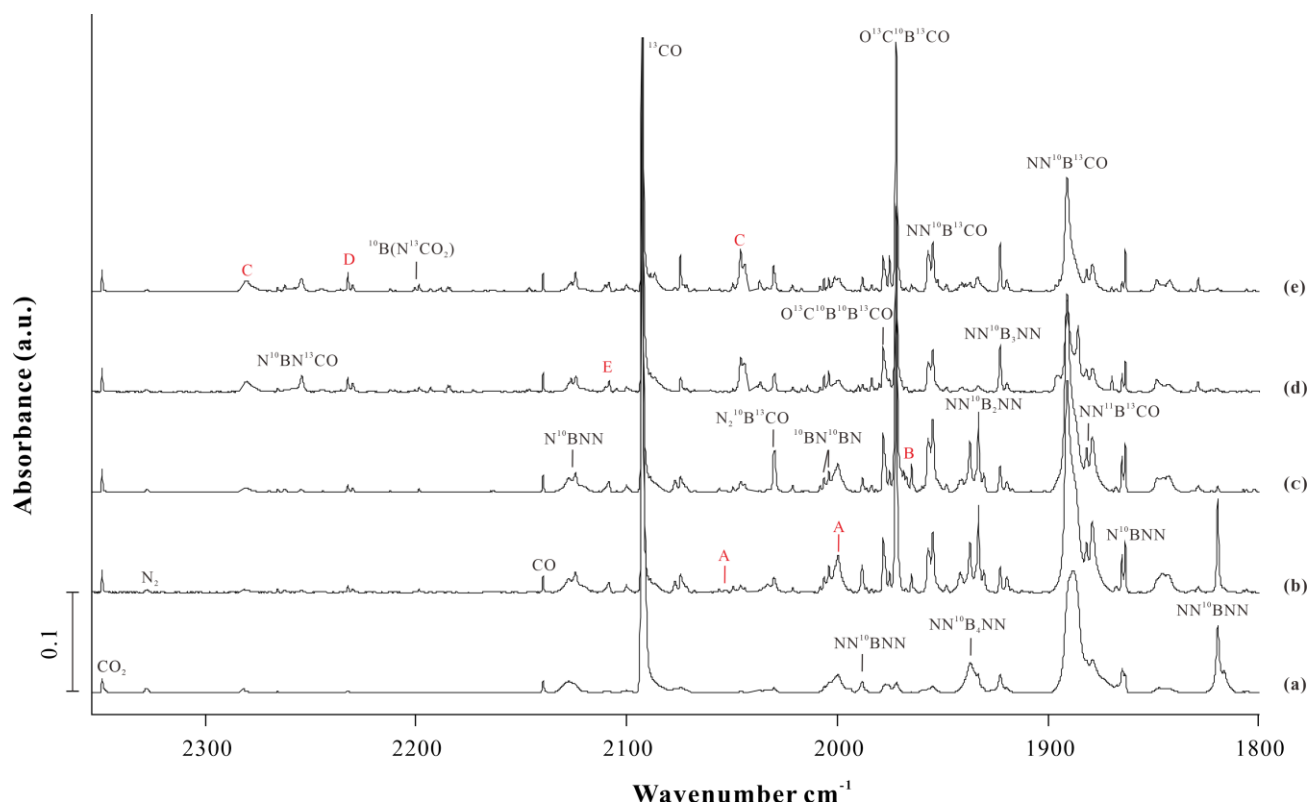

**Fig. S4a.** Infrared spectra in the 2350-1800  $\text{cm}^{-1}$  region of laser-ablated  $^{10}\text{B}$ -enriched boron atoms with 1%  $^{13}\text{CO}$  in the  $\text{N}_2$  matrix. (a) co-deposition at 4 K for 1 h; (b) after annealing to 25 K; (c) after 450 nm irradiation for 10 min; (d) after  $>220$  nm irradiation for 10 min; (e) after annealing to 30 K. [A: NNBB $\text{CO}$ , B:  $(\eta^2\text{-N}_2)\text{BBCO}$ , C: BNB $\text{NCO}$ , D: BN $\text{CO}$ , E: NB $\text{CO}$ ].

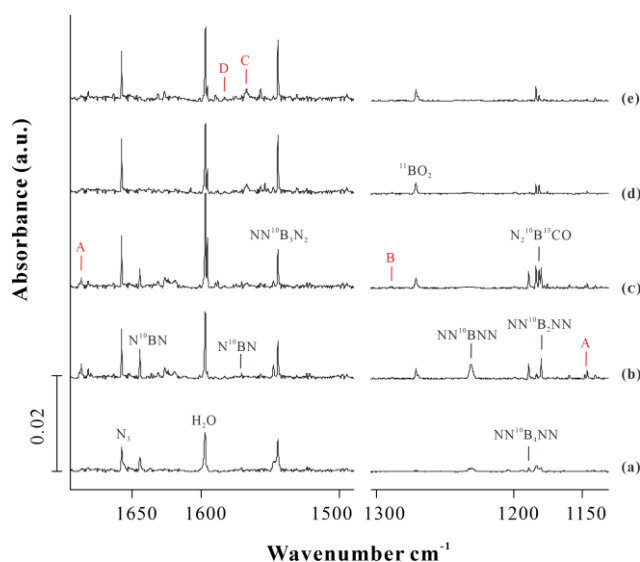

**Fig. S4b.** Infrared spectra in the 1700-1500  $\text{cm}^{-1}$ , 1300-1150  $\text{cm}^{-1}$  regions of laser-ablated  $^{10}\text{B}$ -enriched boron atoms with 1%  $^{13}\text{CO}$  in the  $\text{N}_2$  matrix. (a) co-deposition at 4 K for 1 h; (b) after annealing to 25 K; (c) after 450 nm irradiation for 10 min; (d) after  $>220$  nm irradiation for 10 min; (e) after annealing to 30 K. [A: NNBB $\text{CO}$ , B:  $(\eta^2\text{-N}_2)\text{BBCO}$ , C: BNB $\text{NCO}$ , D: BN $\text{CO}$ ].

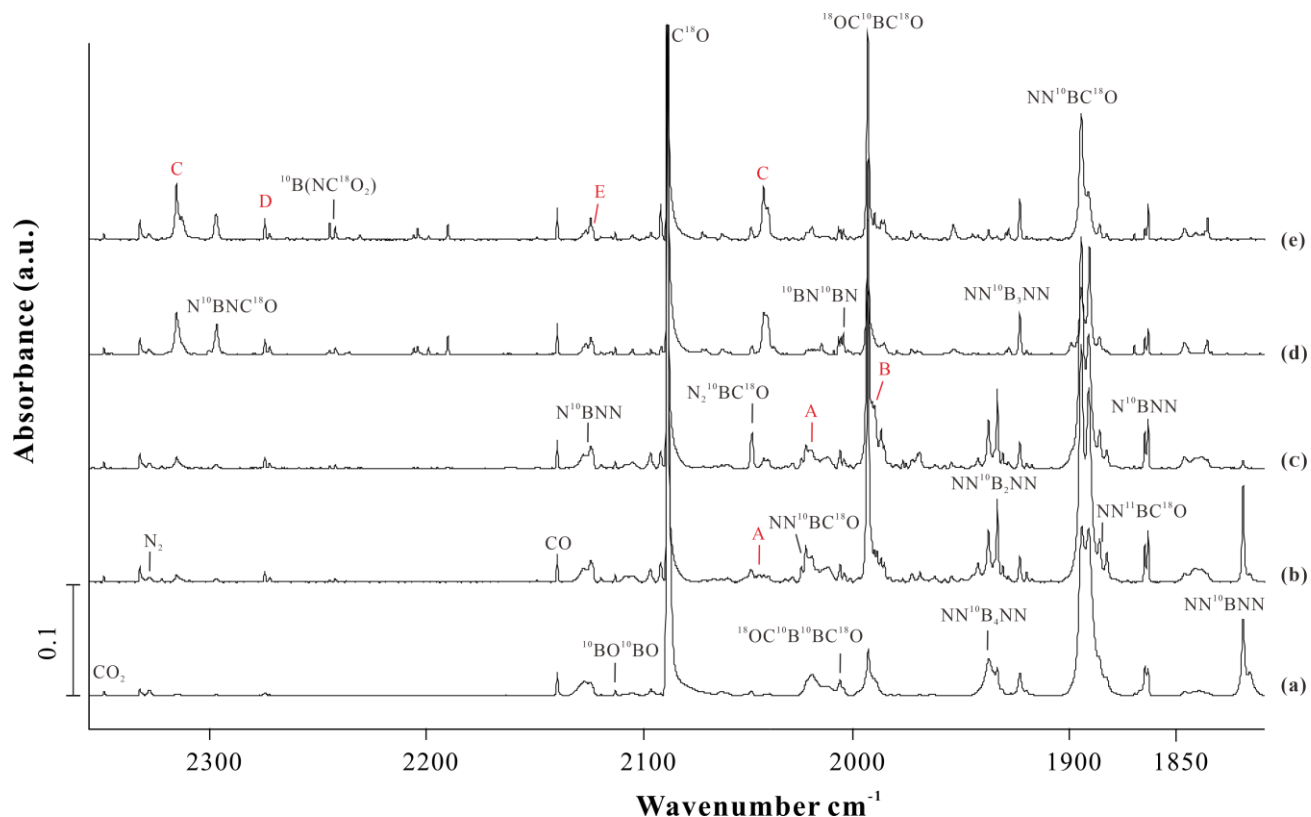

**Fig. S5a.** Infrared spectra in the 2350-1800  $\text{cm}^{-1}$  region of laser-ablated  $^{10}\text{B}$ -enriched boron atoms with 1%  $\text{C}^{18}\text{O}$  in the  $\text{N}_2$  matrix. (a) co-deposition at 4 K for 1 h; (b) after annealing to 25 K; (c) after 450 nm irradiation for 10 min; (d) after  $>220$  nm irradiation for 10 min; (e) after annealing to 30 K. [A: NNBBO, B:  $(\eta^2\text{-N}_2)\text{BBCO}$ , C: BNBNCO, D: BNCO, E: NBCO].

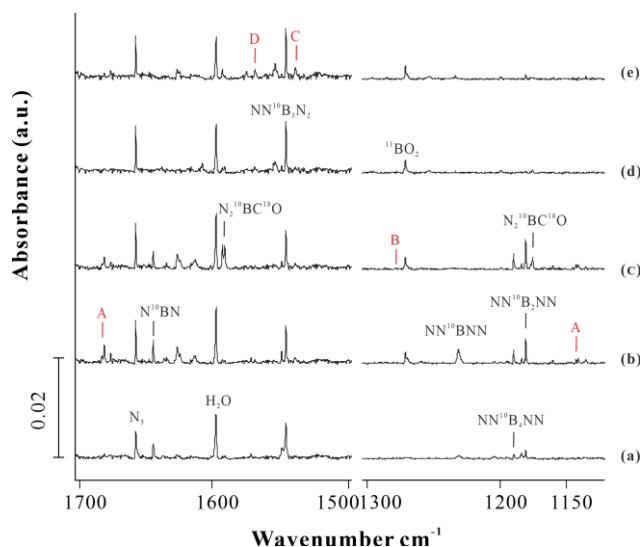

**Fig. S5b.** Infrared spectra in the 1700-1500  $\text{cm}^{-1}$ , 1300-1100  $\text{cm}^{-1}$  regions of laser-ablated  $^{10}\text{B}$ -enriched boron atoms with 1%  $\text{C}^{18}\text{O}$  in the  $\text{N}_2$  matrix. (a) co-deposition at 4 K for 1 h; (b) after annealing to 25 K; (c) after 450 nm irradiation for 10 min; (d) after  $>220$  nm irradiation for 10 min; (e) after annealing to 30 K. [A: NNBBO, B:  $(\eta^2\text{-N}_2)\text{BBCO}$ , C: BNBNCO, D: BNCO].

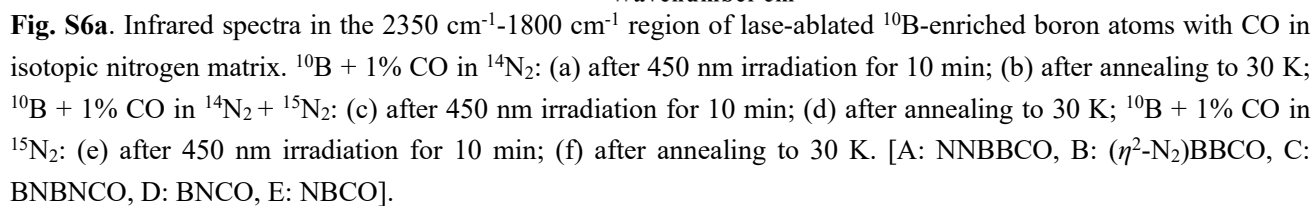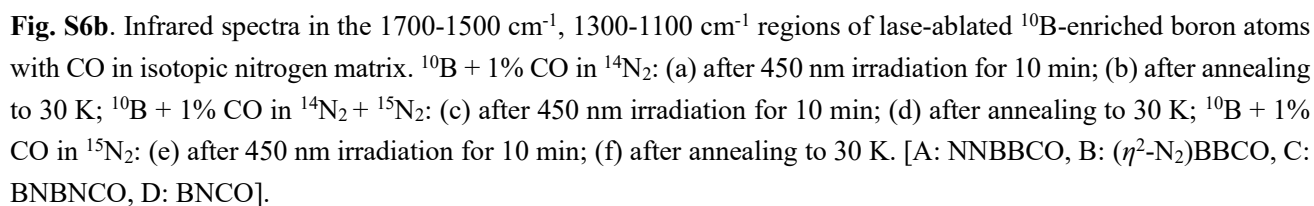



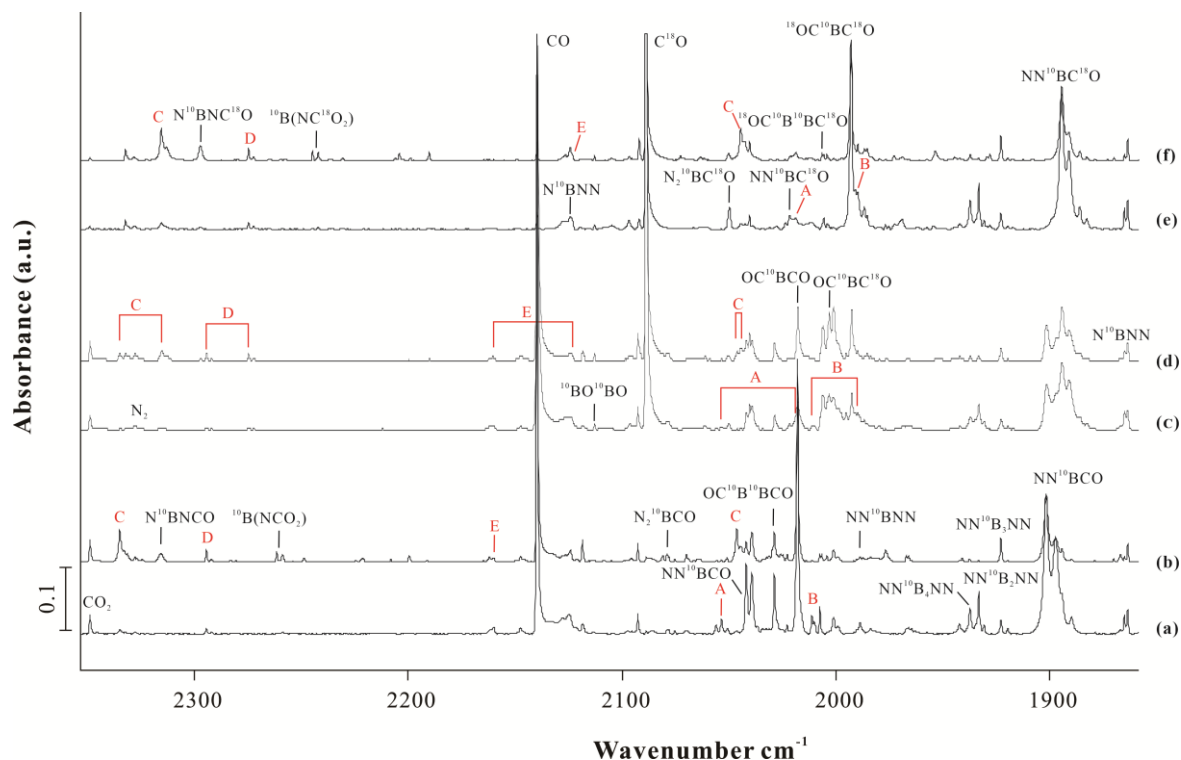

**Fig. S8a.** Infrared spectra in the 2350-1850  $\text{cm}^{-1}$  region of lase-ablated  $^{10}\text{B}$ -enriched boron atoms with  $\text{CO}/\text{C}^{18}\text{O}$  in the  $\text{N}_2$  matrix.  $^{10}\text{B} + 1\% \text{CO}$  in  $^{14}\text{N}_2$ : (a) after 450 nm irradiation for 10 min; (b) after annealing to 30 K;  $^{10}\text{B} + 1\% \text{CO} + 1\% \text{C}^{18}\text{O}$  in  $\text{N}_2$ : (c) after 450 nm irradiation for 10 min; (d) after annealing to 30 K;  $^{10}\text{B} + 1\% \text{C}^{18}\text{O}$  in  $\text{N}_2$ : (e) after 450 nm irradiation for 10 min; (f) after annealing to 30 K. [A: NNBBCO, B:  $(\eta^2\text{-N}_2)\text{BBCO}$ , C: BNBNCO, D: BNCO, E: NBCO].

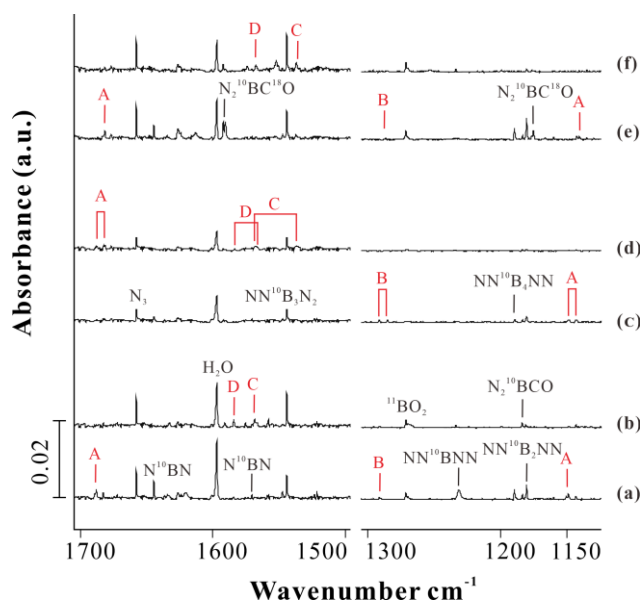

**Fig. S8b.** Infrared spectra in the 1700-1500  $\text{cm}^{-1}$ , 1300-1100  $\text{cm}^{-1}$  regions of lase-ablated  $^{10}\text{B}$ -enriched boron atoms with  $\text{CO}/\text{C}^{18}\text{O}$  in the  $\text{N}_2$  matrix.  $^{10}\text{B} + 1\% \text{CO}$  in  $^{14}\text{N}_2$ : (a) after 450 nm irradiation for 10 min; (b) after annealing to 30 K;  $^{10}\text{B} + 1\% \text{CO} + 1\% \text{C}^{18}\text{O}$  in  $\text{N}_2$ : (c) after 450 nm irradiation for 10 min; (d) after annealing to 30 K;  $^{10}\text{B} + 1\% \text{C}^{18}\text{O}$  in  $\text{N}_2$ : (e) after 450 nm irradiation for 10 min; (f) after annealing to 30 K. [A: NNBBCO, B:  $(\eta^2\text{-N}_2)\text{BBCO}$ , C: BNBNCO, D: BNCO].

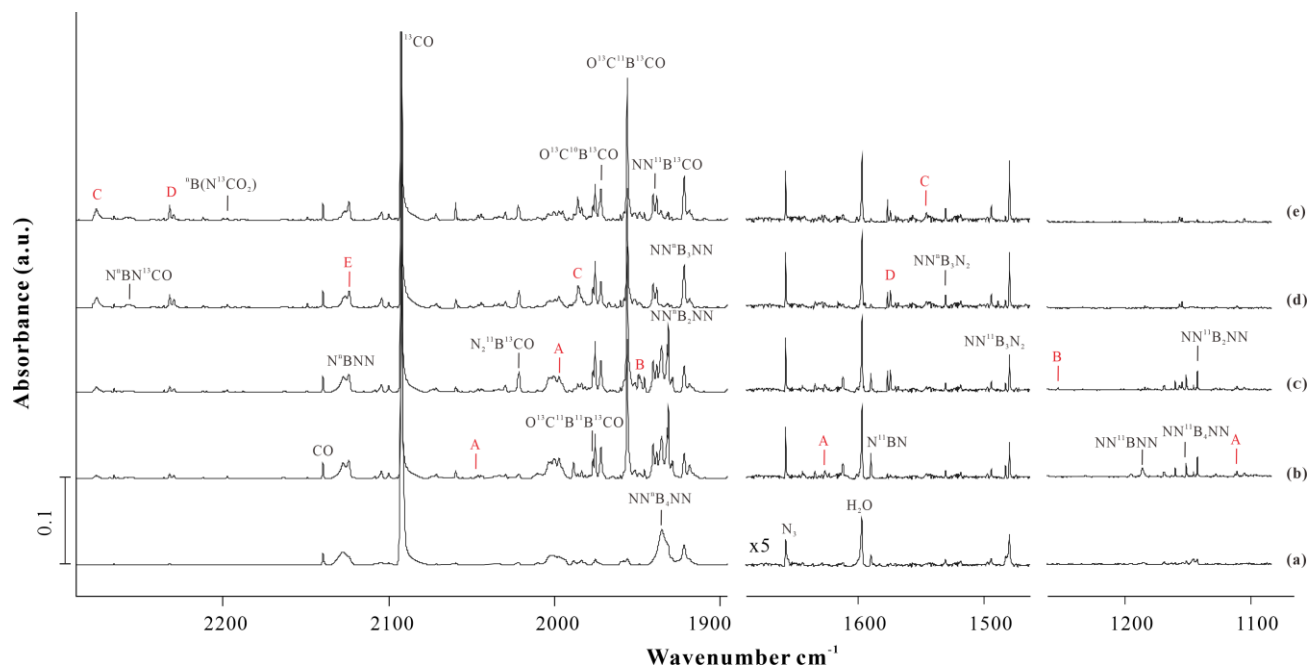

**Fig. S9.** Infrared spectra in the 2300-1900  $\text{cm}^{-1}$ , 1650-1100  $\text{cm}^{-1}$  regions of laser-ablated natural boron atoms with 1%  $^{13}\text{CO}$  in the  $\text{N}_2$  matrix. (a) co-deposition at 4 K for 1 h; (b) after annealing to 25 K; (c) after 450 nm irradiation for 10 min; (d) after >220 nm irradiation for 10 min; (e) after annealing to 30 K. [A: NNBBCO, B: ( $\eta^2\text{-N}_2$ )BBCO, C: BNBNCO, D: BNCO, E: NBCO].

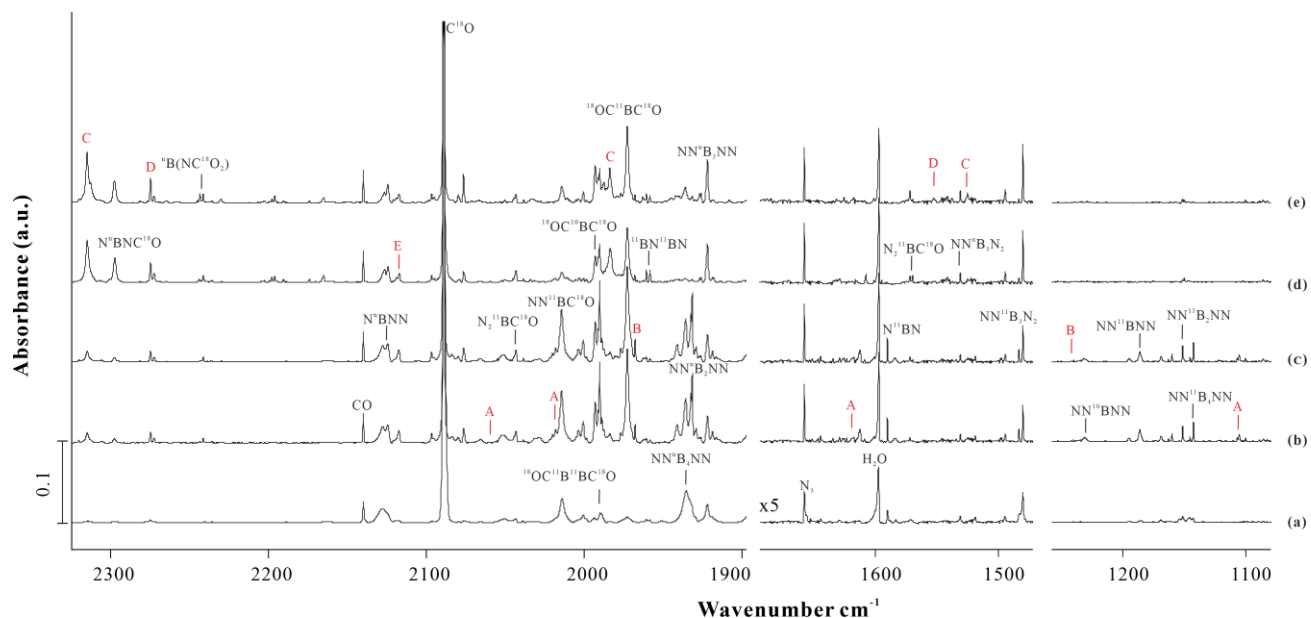

**Fig. S10.** Infrared spectra in the 2330-1900  $\text{cm}^{-1}$ , 1650-1100  $\text{cm}^{-1}$  regions of laser-ablated natural boron atoms with 1%  $\text{C}^{18}\text{O}$  in the  $\text{N}_2$  matrix. (a) co-deposition at 4 K for 1 h; (b) after annealing to 25 K; (c) after 450 nm irradiation for 10 min; (d) after >220 nm irradiation for 10 min; (e) after annealing to 30 K. [A: NNBBCO, B: ( $\eta^2\text{-N}_2$ )BBCO, C: BNBNCO, D: BNCO, E: NBCO].

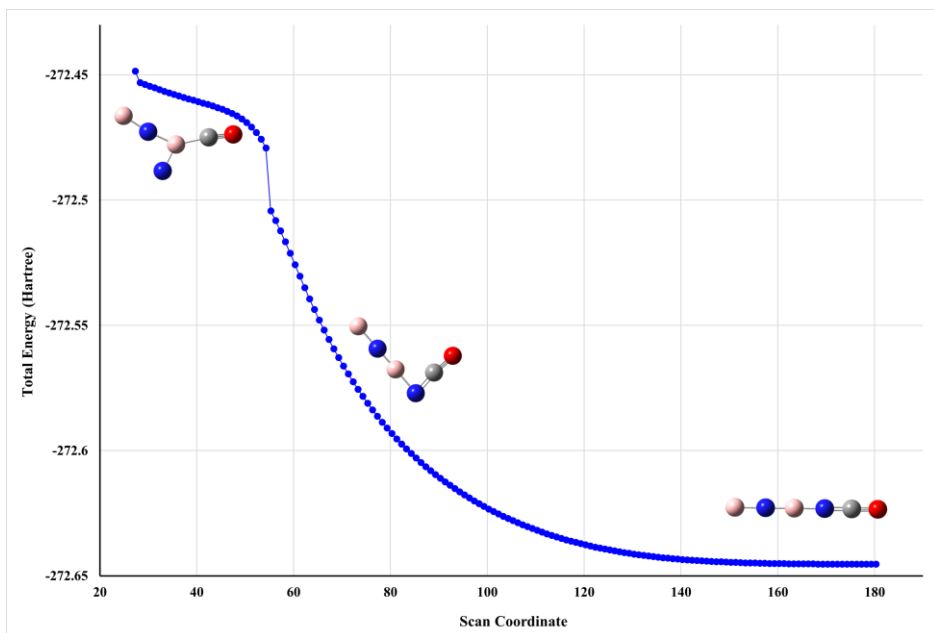

**Fig. S11.** Potential Energy Surface of BNBNCO from TS5 (in Fig. 3) at the B3LYP/def2-TZVPP level of theory.

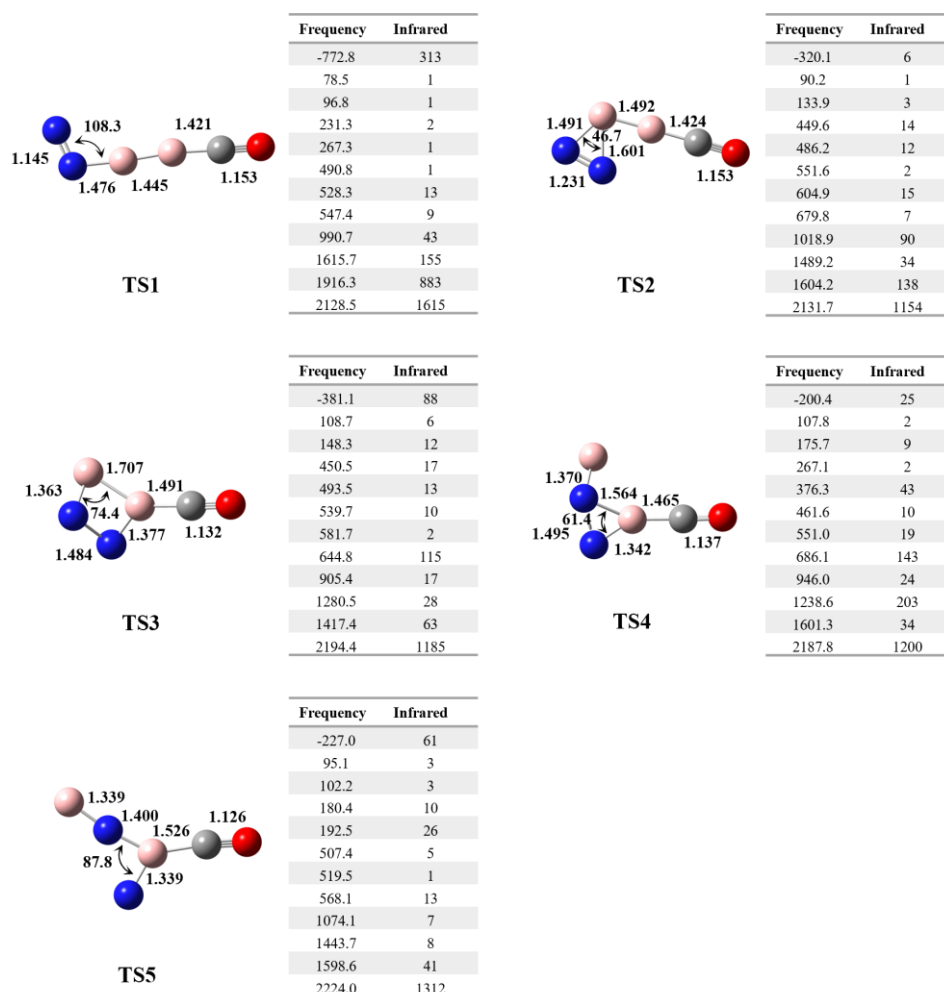

**Fig. S12.** Transition state structures (TS1-TS5) ( $^1A_1$ ,  $C_1$ ) (in Fig. 3) for the reaction from NNBBCO to  $(\eta^2-N_2)$ BBCO and BNBNCO and their frequencies ( $\text{cm}^{-1}$ ) at the B3LYP/def2-TZVPP level of theory.



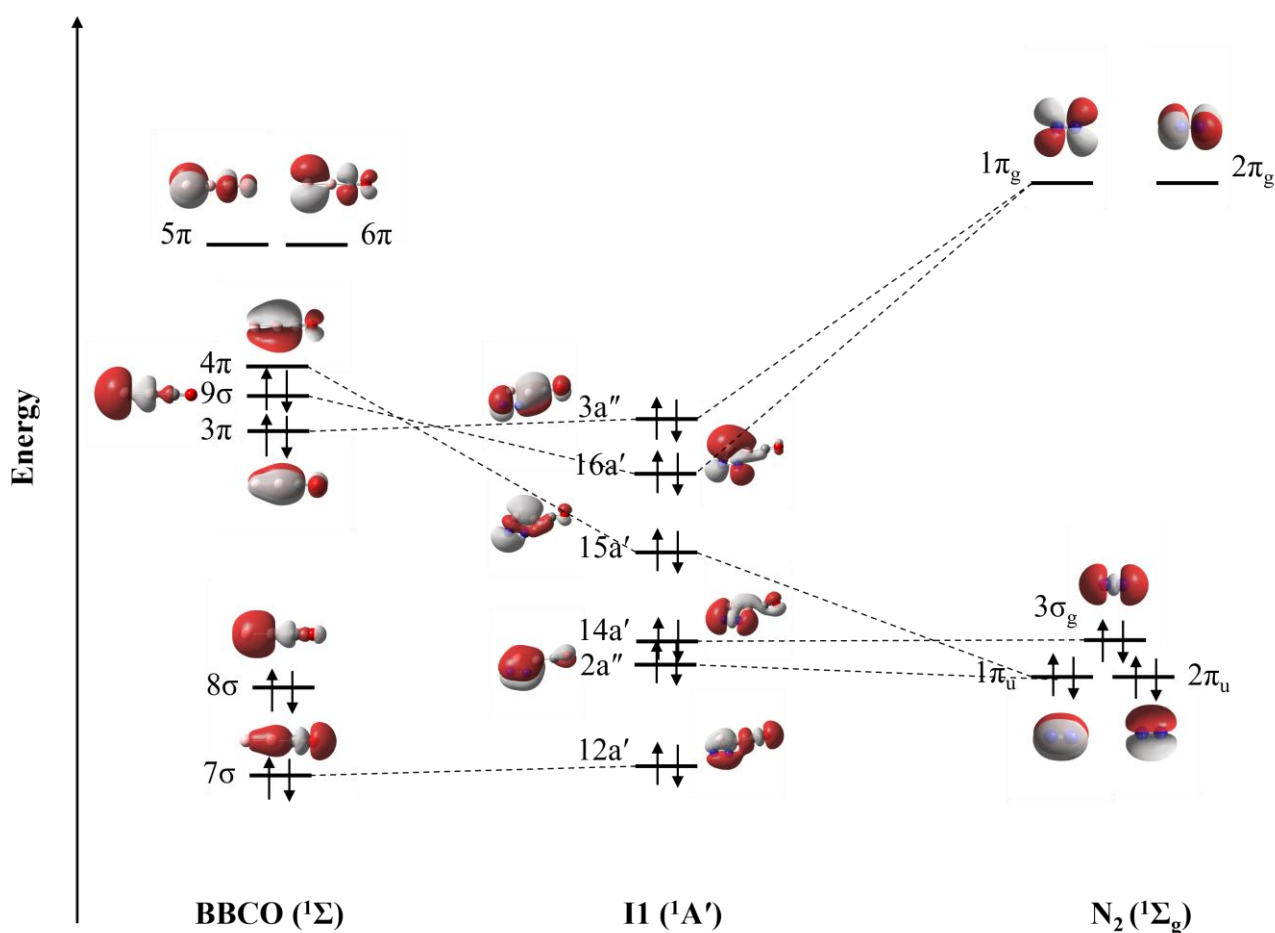

**Fig. S13.** Qualitative bonding scheme of the frontier molecular orbitals (FMOs, isovalue = 0.02 a.u.) of I1 ( $^1A'$ ) (in Fig. 3) illustrating two fragments bonding interactions between a N<sub>2</sub> ( $^1\Sigma_g$ ) molecule and a BBCO ( $^1\Sigma$ ) fragment which were optimized at the B3LYP/def2-TZVPP level.

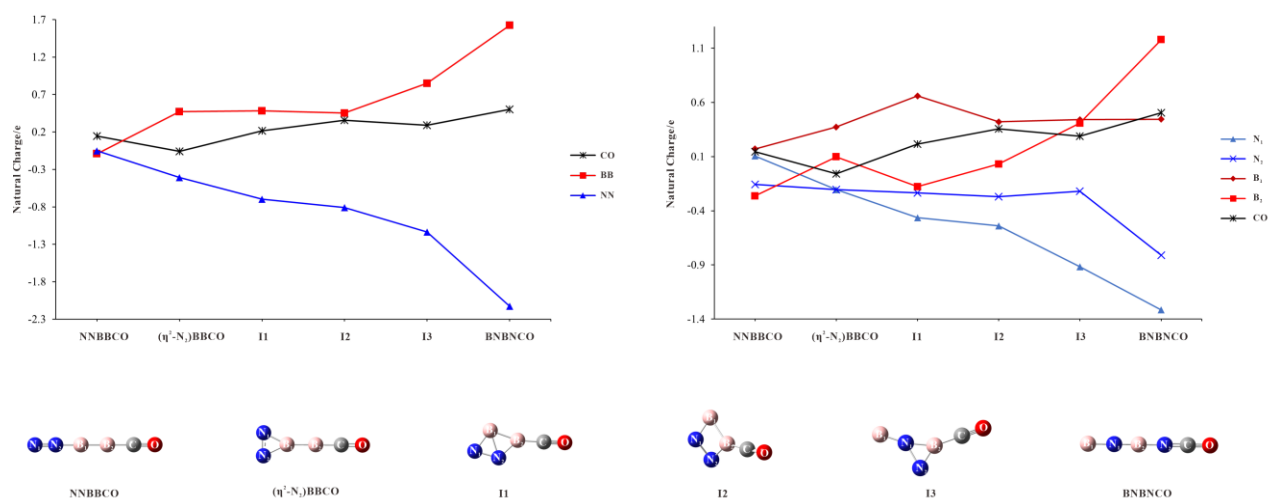

**Fig. S14.** Charges on atoms of stationary points along the isomerization process of NNBBCO to BNBNCO.

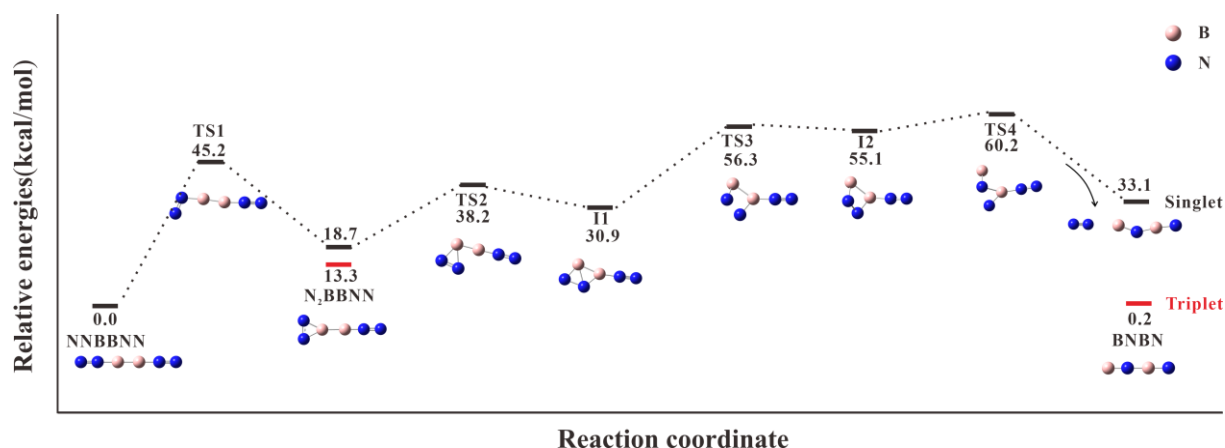

**Fig. S15.** Potential energy surface for the reaction from NNBBNN to  $(\eta^2\text{-N}_2)\text{BBNN}$  and  $\text{BNNB} + \text{N}_2$  calculated at the B3LYP/def2-TZVPP level. Energies were given in kcal/mol. Red lines denote stationary points on the triplet surface and black lines on the singlet surface.

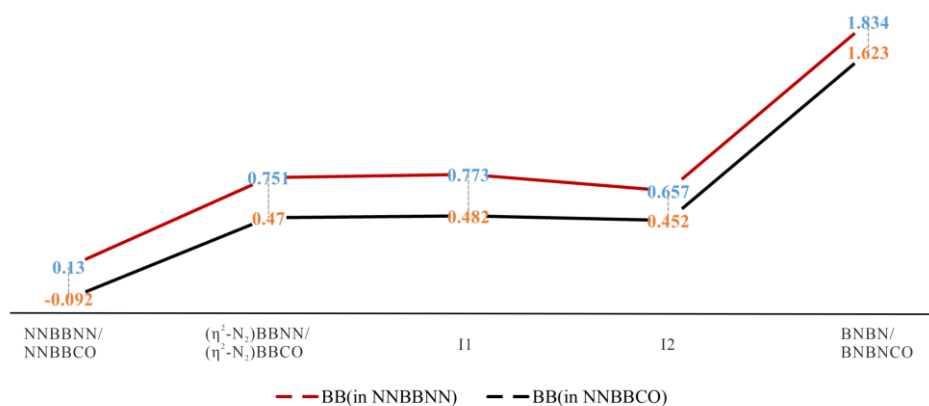

**Fig. S16.** Charges on B–B centres of stationary points along the isomerization process of NNBBNN or NNBBCO.

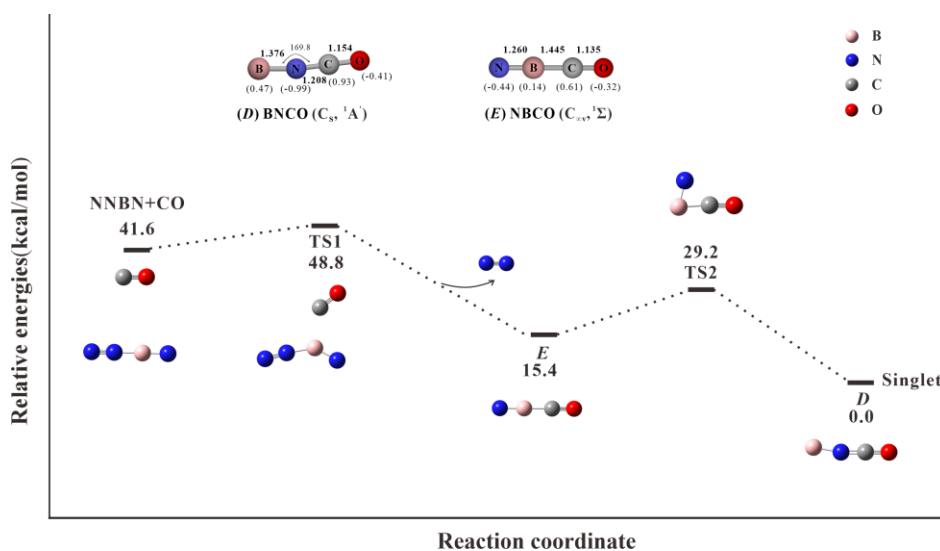

**Fig. S17.** Potential energy surface for the reaction of NNBN with CO to form NBCO (*E*) and BNCO (*D*) calculated at the B3LYP/def2-TZVPP level. Energies were given in kcal/mol. Top: Structures of the BNCO (*D*) and NBCO (*E*) optimized at the B3LYP/def2-TZVPP functionals/basis set. Bond lengths were in Å and angles in degree. The natural population charges were given in parentheses.

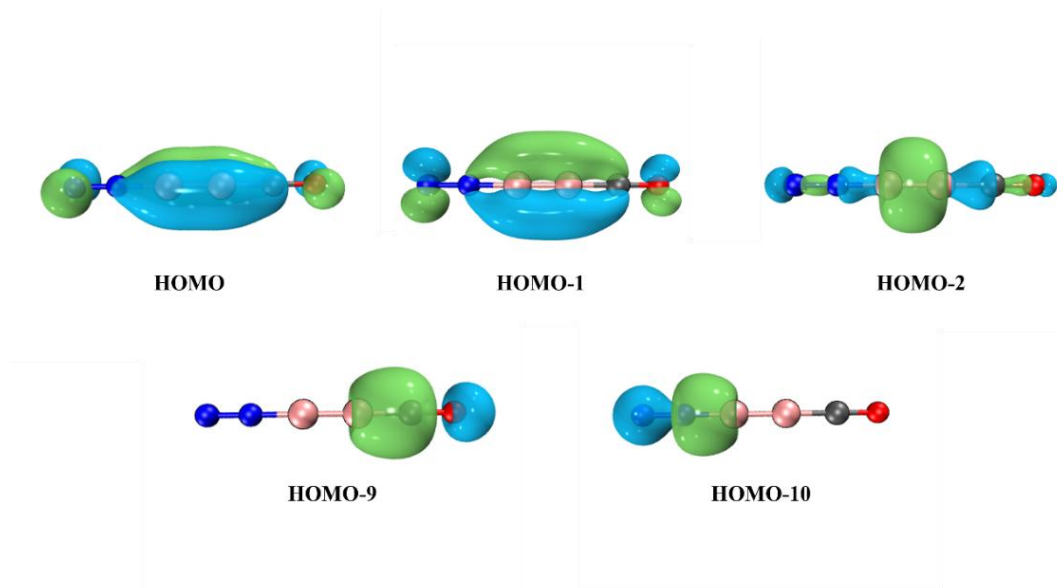

**Fig. S18.** Selected frontier molecular orbitals of NNBBCO (*A*) ( $C_{\infty v}, {}^1\Sigma$ ) calculated at the B3LYP/def2-TZVPP level.

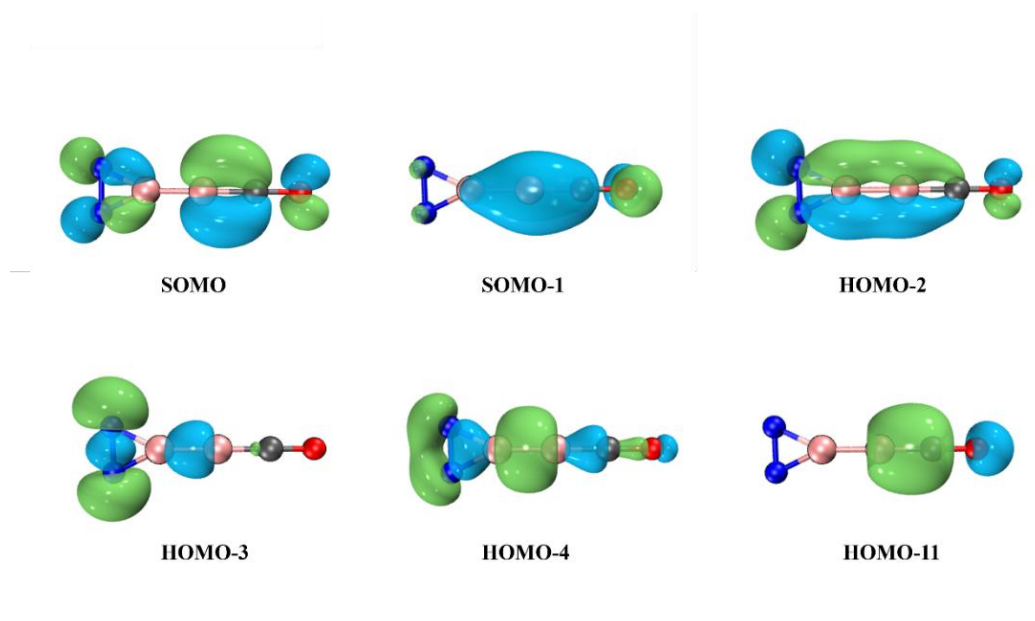

**Fig. S19.** Selected frontier molecular orbitals of  $(\eta^2\text{-N}_2)\text{BBCO}$  (*B*) ( $C_{2v}, {}^3A_2$ ) calculated at the B3LYP/def2-TZVPP level.

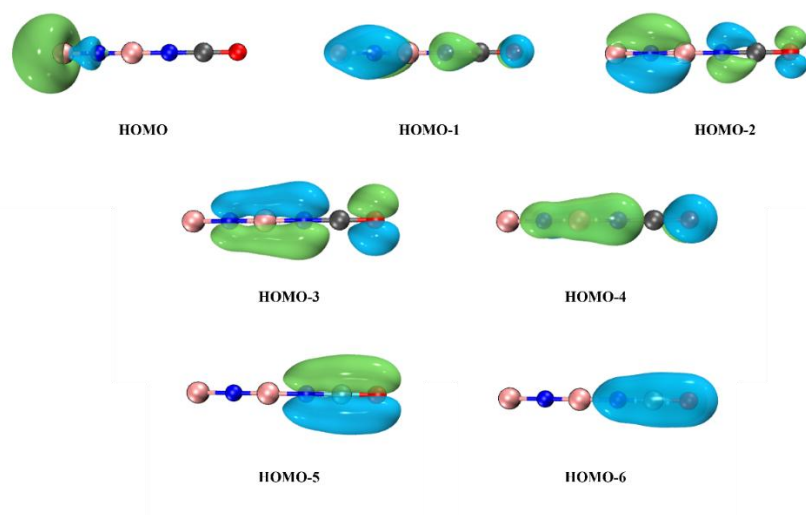

**Fig. S20.** Selected frontier molecular orbitals of BNBNC(O) (C) ( $C_{\infty v}$ ,  $^1\Sigma$ ) calculated at the B3LYP/def2-TZVPP level.

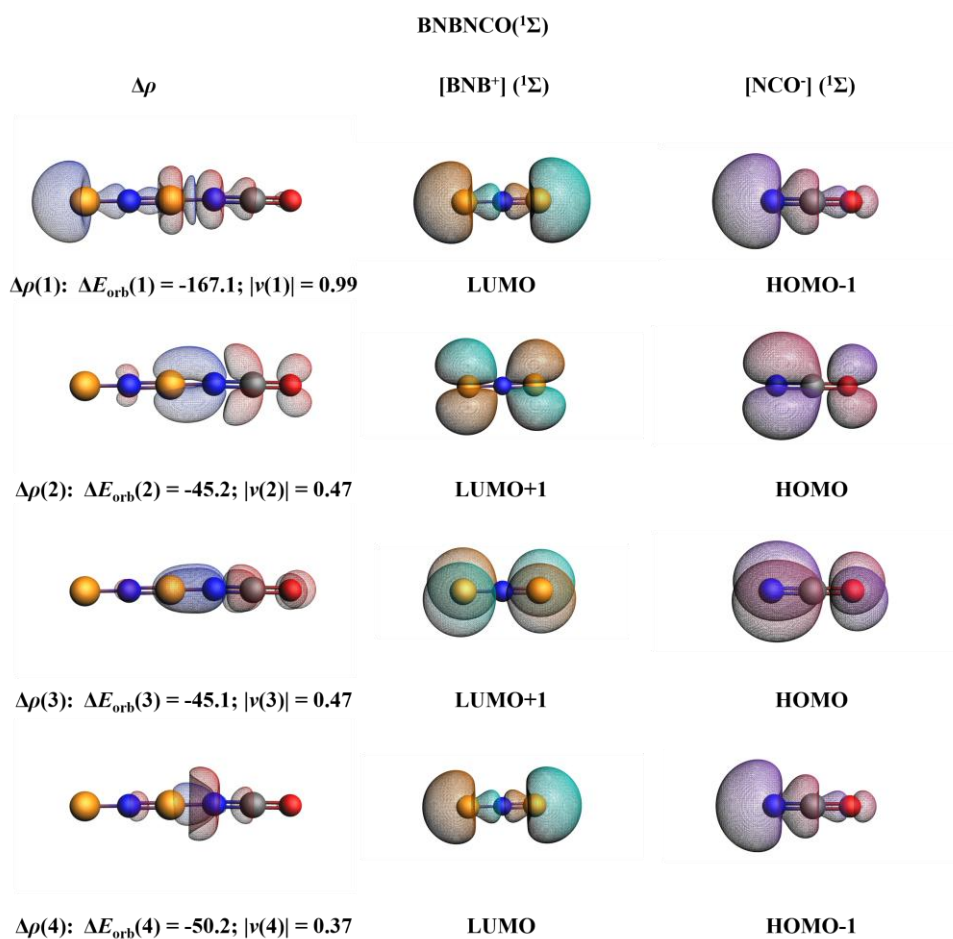

**Fig. S21.** Plot of the deformation densities  $\Delta\rho$  of BNBNC(O) ( $^1\Sigma$ ) at the Hybrid/B3LYP/TZ2P level taking [BNB $^+$ ] ( $^1\Sigma$ ) and [NCO $^-$ ] ( $^1\Sigma$ ) as interacting fragments with the associated interaction energy  $\Delta E_{\text{orb}}$  (in kcal/mol) and charge eigenvalues  $|v_n|$  (in e). Isosurface value is 0.003 a.u. The color coding of the deformation densities  $\Delta\rho(n)$  gives the charge flow from the red to the blue area.

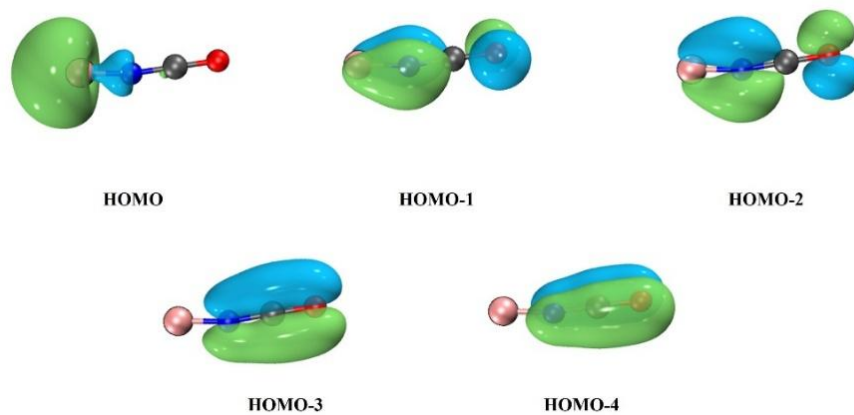

**Fig. S22.** Selected frontier molecular orbitals of BNCO (*D*) ( $C_s$ ,  $^1A'$ ) calculated at the B3LYP/def2-TZVPP level.

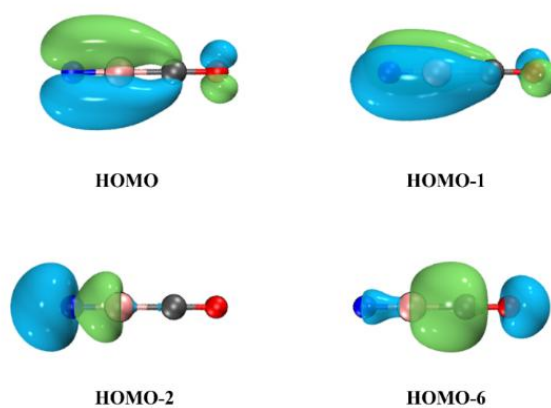

**Fig. S23.** Selected frontier molecular orbitals of NBCO (*E*) ( $C_{\infty v}$ ,  $^1\Sigma$ ) calculated at the B3LYP/def2-TZVPP level.

## Supplementary Tables

**Table S1.** Observed and calculated (B3LYP/def2-TZVPP) infrared absorptions ( $\text{cm}^{-1}$ ) and intensities (km/mol, in parentheses) for isotopomers of products *A-E* in the reactions of  $^{10}\text{B}$  with CO in a  $\text{N}_2$  matrix.

|                                                              | Assignment  | $^{10}\text{B}+\text{CO}/^{14}\text{N}_2$ |        | $^{10}\text{B}+^{13}\text{CO}/^{14}\text{N}_2$ |        | $^{10}\text{B}+\text{C}^{18}\text{O}/^{14}\text{N}_2$ |        | $^{10}\text{B}+\text{CO}/^{15}\text{N}_2$ |        |
|--------------------------------------------------------------|-------------|-------------------------------------------|--------|------------------------------------------------|--------|-------------------------------------------------------|--------|-------------------------------------------|--------|
|                                                              |             | B3LYP <sup>[a]</sup>                      | Obs.   | B3LYP <sup>[a]</sup>                           | Obs.   | B3LYP <sup>[a]</sup>                                  | Obs.   | B3LYP <sup>[a]</sup>                      | Obs.   |
| <b>(A)</b> NNBBCO<br>( $^1\Sigma$ )                          | NN, CO sym  | 2081.4 (133)                              | 2066.5 | 2071.7 (498)                                   | 2053.2 | 2072.8 (307)                                          | 2046.5 | 2074.3 (1354)                             | 2050.2 |
|                                                              | NN, CO asym | 2061.3 (2507)                             | 2053.6 | 2020.0 (2035)                                  | 1999.8 | 2037.1 (2266)                                         | 2018.7 | 1999.0 (1225)                             | 1990.1 |
|                                                              | BB str      | 1746.6 (44)                               | 1688.0 | 1745.5 (57)                                    | 1687.0 | 1739.9 (71)                                           | 1681.6 | 1745.2 (37)                               | 1686.4 |
|                                                              | BB str      | 1117.8 (78)                               | 1149.0 | 1117.1 (80)                                    | 1147.1 | 1109.5 (70)                                           | 1140.8 | 1112.4 (76)                               | 1143.7 |
| <b>(B)</b> ( $\eta^2\text{-N}_2$ )BBCO<br>( $^3\text{A}_2$ ) | CO str      | 2001.2 (854)                              | 2011.2 | 1949.8 (812)                                   | 1967.3 | 1970.8 (819)                                          | 1989.7 | 2001.2 (853)                              | 2009.5 |
|                                                              | NN str      | 1623.8 (36)                               | /      | 1623.7 (35)                                    | /      | 1622.5 (33)                                           | /      | 1596.0 (26)                               | /      |
|                                                              | BB str      | 1323.7 (80)                               | 1291.3 | 1323.7 (80)                                    | 1289.7 | 1312.5 (89)                                           | 1279.1 | 1311.5 (80)                               | 1280.8 |
| <b>(C)</b> BNBBCO<br>( $^1\Sigma$ )                          | CO str      | 2356.4 (2228)                             | 2335.1 | 2294.8 (2236)                                  | 2276.9 | 2341.1 (2254)                                         | 2315.6 | 2341.2 (2116)                             | 2322.7 |
|                                                              | BN str      | 2046.8 (2147)                             | 2046.3 | 2045.6 (2033)                                  | 2045.9 | 2044.8 (2092)                                         | 2044.4 | 2022.5 (2143)                             | 2021.3 |
|                                                              | BN str      | 1576.3 (211)                              | 1568.7 | 1574.2 (221)                                   | 1567.0 | 1556.7 (224)                                          | 1537.5 | 1541.9 (200)                              | 1536.5 |
|                                                              | BN str      | 1235.5 (109)                              | /      | 1235.4 (110)                                   | /      | 1223.4 (97)                                           | /      | 1227.0 (119)                              | /      |
| <b>(D)</b> BNCO<br>( $^1\text{A}$ )                          | CO str      | 2306.7 (1540)                             | 2294.5 | 2244.1 (1496)                                  | 2232.4 | 2288.4 (1543)                                         | 2274.8 | 2295.1 (1480)                             | 2285.3 |
|                                                              | BN str      | 1586.1 (280)                              | 1584.4 | 1584.7 (267)                                   | 1583.1 | 1563.2 (266)                                          | 1567.7 | 1555.5 (295)                              | 1550.6 |
|                                                              | BN str      | 921.5 (131)                               | /      | 919.6 (129)                                    | /      | 905.6 (125)                                           | /      | 920.7 (129)                               | /      |
| <b>(E)</b> NBCO<br>( $^1\Sigma$ )                            | CO str      | 2174.4 (1008)                             | 2160.2 | 2125.1 (970)                                   | 2108.4 | 2141.7 (1000)                                         | 2123.3 | 2173.2 (1004)                             | 2160.0 |
|                                                              | BN str      | 1939.3 (12)                               | /      | 1935.1 (3)                                     | /      | 1928.1 (1)                                            | /      | 1921.4 (17)                               | /      |

[a] Scaled frequencies using a scaling factor of 0.9661, which is obtained from the ratio of the experimental stretching frequency ( $2139\text{ cm}^{-1}$ ) and the calculated value ( $2214\text{ cm}^{-1}$ ) for CO.

**Table S2.** Comparisons between experimental and calculated vibrational frequencies and isotopic frequency ratios of products *A-E* in the reactions of boron with CO in a N<sub>2</sub> matrix.

|                                                                                     |             |                      |        | <sup>10</sup> B/ <sup>11</sup> B |        | <sup>12</sup> C/ <sup>13</sup> C |        | <sup>16</sup> O/ <sup>18</sup> O |        | <sup>14</sup> N/ <sup>15</sup> N |        |
|-------------------------------------------------------------------------------------|-------------|----------------------|--------|----------------------------------|--------|----------------------------------|--------|----------------------------------|--------|----------------------------------|--------|
|                                                                                     | Assignment  | B3LYP <sup>[a]</sup> | Obs.   | Cal.                             | Exp.   | Cal.                             | Exp.   | Cal.                             | Exp.   | Cal.                             | Exp.   |
| <b>(A)</b> NNBBCO<br>( <sup>1</sup> Σ)                                              | NN, CO sym  | 2081.4               | 2066.5 | 1.0019                           | /      | 1.0047                           | 1.0065 | 1.0041                           | 1.0098 | 1.0034                           | 1.0080 |
|                                                                                     | NN, CO asym | 2061.3               | 2053.6 | 1.0015                           | 1.0030 | 1.0204                           | 1.0269 | 1.0119                           | 1.0173 | 1.0312                           | 1.0319 |
|                                                                                     | BB str      | 1746.6               | 1688.0 | 1.0442                           | 1.0377 | 1.0007                           | 1.0006 | 1.0038                           | 1.0038 | 1.0008                           | 1.0009 |
|                                                                                     | BB str      | 1117.8               | 1149.0 | 1.0342                           | 1.0318 | 1.0006                           | 1.0017 | 1.0075                           | 1.0072 | 1.0049                           | 1.0046 |
| <b>(B)</b> (η <sup>2</sup> -N <sub>2</sub> )BBCO<br>( <sup>3</sup> A <sub>2</sub> ) | CO str      | 2001.2               | 2011.2 | 1.0027                           | 1.0070 | 1.0264                           | 1.0223 | 1.0154                           | 1.0108 | 1.0000                           | 1.0008 |
|                                                                                     | NN str      | 1623.8               | /      | 1.0201                           | /      | 1.0000                           | /      | 1.0008                           | /      | 1.0174                           | /      |
|                                                                                     | BB str      | 1323.7               | 1291.3 | 1.0301                           | 1.0303 | 1.0000                           | 1.0012 | 1.0085                           | 1.0095 | 1.0093                           | 1.0082 |
| <b>(C)</b> BNBNCO<br>( <sup>1</sup> Σ)                                              | CO str      | 2356.4               | 2335.1 | 1.0002                           | 1.0004 | 1.0269                           | 1.0256 | 1.0066                           | 1.0084 | 1.0065                           | 1.0053 |
|                                                                                     | BN str      | 2046.8               | 2046.3 | 1.0290                           | 1.0301 | 1.0006                           | 1.0002 | 1.0009                           | 1.0009 | 1.0120                           | 1.0124 |
|                                                                                     | BN str      | 1576.3               | 1568.7 | 1.0046                           | 1.0139 | 1.0014                           | 1.0011 | 1.0126                           | 1.0203 | 1.0223                           | 1.0210 |
|                                                                                     | BN str      | 1235.5               | /      | 1.0315                           | /      | 1.0002                           | /      | 1.0100                           | /      | 1.0069                           | /      |
| <b>(D)</b> BNCO<br>( <sup>1</sup> A')                                               | CO str      | 2306.7               | 2294.5 | 1.0001                           | 1.0001 | 1.0279                           | 1.0278 | 1.0080                           | 1.0087 | 1.0050                           | 1.0040 |
|                                                                                     | BN str      | 1586.1               | 1584.4 | 1.0073                           | 1.0049 | 1.0008                           | 1.0008 | 1.0146                           | 1.0107 | 1.0197                           | 1.0218 |
|                                                                                     | BN str      | 921.5                | /      | 1.0308                           | /      | 1.0021                           | /      | 1.0176                           | /      | 1.0009                           | /      |
| <b>(E)</b> NBCO<br>( <sup>1</sup> Σ)                                                | CO str      | 2174.4               | 2160.2 | 1.0041                           | 1.0017 | 1.0232                           | 1.0246 | 1.0152                           | 1.0174 | 1.0005                           | 1.0001 |
|                                                                                     | BN str      | 1939.3               | /      | 1.0290                           | /      | 1.0022                           | /      | 1.0058                           | /      | 1.0094                           | /      |

[a] Scaled frequencies using a scaling factor of 0.9661, which is obtained from the ratio of the experimental stretching frequency (2139 cm<sup>-1</sup>) and the calculated value (2214 cm<sup>-1</sup>) for CO.

**Table S3.** Observed and calculated (B3LYP/def2-TZVPP) infrared absorptions ( $\text{cm}^{-1}$ ) and intensities ( $\text{km/mol}$ , in parentheses) for isotopomers of products **A-E** in the reactions of  $^{10}\text{B}$  with CO in a  $\text{N}_2$  matrix.

|                                                              | Assignment  | $^{11}\text{B}^{11}\text{B}$ |        | $^{10}\text{B}^{11}\text{B}$ |        | $^{11}\text{B}^{10}\text{B}$ |        | $^{10}\text{B}^{10}\text{B}$ |        |
|--------------------------------------------------------------|-------------|------------------------------|--------|------------------------------|--------|------------------------------|--------|------------------------------|--------|
|                                                              |             | B3LYP <sup>[a]</sup>         | Obs.   |
| <b>(A)</b> NNBBCO<br>( $^1\Sigma$ )                          | NN, CO sym  | 2077.4 (24)                  | /      | 2078.7 (19)                  | /      | 2079.9 (151)                 | 2065.3 | 2081.4 (133)                 | 2066.5 |
|                                                              | NN, CO asym | 2058.3 (2616)                | 2047.5 | 2058.4 (2622)                | 2047.5 | 2061.3 (2491)                | 2053.6 | 2061.3 (2507)                | 2053.6 |
|                                                              | BB str      | 1672.6 (25)                  | 1626.7 | 1713.6 (32)                  | 1643.1 | 1708.5 (34)                  | 1634.6 | 1746.6 (44)                  | 1688.0 |
|                                                              | BB str      | 1080.8 (77)                  | 1113.6 | 1097.4 (77)                  | 1131.5 | 1098.6 (78)                  | 1129.7 | 1117.8 (78)                  | 1149.0 |
| <b>(B)</b> ( $\eta^2\text{-N}_2$ )BBCO<br>( $^3\text{A}_2$ ) | CO str      | 1995.8 (812)                 | 1997.2 | 1995.8 (855)                 | 1997.2 | 2001.2 (853)                 | 2011.2 | 2001.2 (854)                 | 2011.2 |
|                                                              | NN str      | 1591.8 (52)                  | /      | 1617.3 (46)                  | /      | 1598.1 (41)                  | /      | 1623.8 (36)                  | /      |
|                                                              | BB str      | 1285.0 (65)                  | 1253.3 | 1287.7 (70)                  | 1257.3 | 1322.6 (76)                  | 1290.4 | 1323.7 (80)                  | 1291.3 |
| <b>(C)</b> BNBBCO<br>( $^1\Sigma$ )                          | CO str      | 2356.0 (2186)                | 2334.1 | 2356.1 (2177)                | 2334.1 | 2356.3 (2237)                | 2334.1 | 2347.7 (2228)                | 2335.1 |
|                                                              | BN str      | 1989.0 (2095)                | 1986.5 | 1990.7 (2130)                | 1988.6 | 2045.4 (2115)                | 2044.7 | 2046.8 (2147)                | 2046.3 |
|                                                              | BN str      | 1569.1 (188)                 | 1547.2 | 1575.9 (197)                 | 1567.0 | 1569.3 (197)                 | 1548.5 | 1576.3 (211)                 | 1568.7 |
|                                                              | BN str      | 1197.8 (91)                  | /      | 1221.5 (89)                  | /      | 1211.8 (111)                 | /      | 1235.5 (109)                 | /      |
| <b>(D)</b> BNCO<br>( $^1\text{A}'$ )                         | CO str      | 2306.5 (1534)                | 2294.3 | /                            | /      | /                            | /      | 2306.7 (1540)                | 2294.5 |
|                                                              | BN str      | 1574.5 (261)                 | 1576.7 | /                            | /      | /                            | /      | 1586.0 (280)                 | 1584.4 |
|                                                              | BN str      | 894.0 (129)                  | /      | /                            | /      | /                            | /      | 921.5 (131)                  | /      |
| <b>(E)</b> NBCO<br>( $^1\Sigma$ )                            | CO str      | 2165.6 (970)                 | 2156.5 |                              |        |                              |        | 2174.4 (1008)                | 2160.2 |
|                                                              | BN str      | 1884.7 (13)                  | /      |                              |        |                              |        | 1939.3 (12)                  | /      |

[a] Scaled frequencies using a scaling factor of 0.9661, which is obtained from the ratio of the experimental stretching frequency ( $2139\text{ cm}^{-1}$ ) and the calculated value ( $2214\text{ cm}^{-1}$ ) for CO.



**Table S4.** Observed and calculated (B3LYP/def2-TZVPP) infrared absorptions ( $\text{cm}^{-1}$ ) and intensities ( $\text{km/mol}$ , in parentheses) for isotopomers of products *A-E* in the reactions of  $^{10}\text{B}$  with CO in a  $\text{N}_2$  matrix.

|                                                              |             | $^{11}\text{B}+^{14}\text{CO}/^{14}\text{N}_2$ |        | $^{11}\text{B}+^{13}\text{CO}/^{14}\text{N}_2$ |        | $^{11}\text{B}+^{18}\text{O}/^{14}\text{N}_2$ |        |
|--------------------------------------------------------------|-------------|------------------------------------------------|--------|------------------------------------------------|--------|-----------------------------------------------|--------|
|                                                              | Assignment  | B3LYP <sup>[a]</sup>                           | Obs.   | B3LYP <sup>[a]</sup>                           | Obs.   | B3LYP <sup>[a]</sup>                          | Obs.   |
| <b>(A)</b> NNBBCO<br>( $^1\Sigma$ )                          | NN, CO sym  | 2077.4 (24)                                    | /      | 2070.4 (549)                                   | 2048.0 | 2071.1 (403)                                  | 2046.2 |
|                                                              | NN, CO asym | 2058.3 (2616)                                  | 2047.5 | 2013.4 (1992)                                  | 1997.5 | 2030.1 (2181)                                 | 2018.1 |
|                                                              | BB str      | 1672.6 (25)                                    | 1626.7 | 1672.2 (29)                                    | 1626.5 | 1667.5 (39)                                   | 1618.8 |
|                                                              | BB str      | 1080.8 (77)                                    | 1113.6 | 1080.0 (79)                                    | 1111.2 | 1072.6 (69)                                   | 1106.6 |
| <b>(B)</b> ( $\eta^2\text{-N}_2$ )BBCO<br>( $^3\text{A}_2$ ) | CO str      | 1995.8 (812)                                   | 1997.2 | 1944.2 (812)                                   | 1949.5 | 1964.5 (819)                                  | 1970.2 |
|                                                              | NN str      | 1591.8 (52)                                    | /      | 1591.8 (51)                                    | /      | 1591.1 (49)                                   | /      |
|                                                              | BB str      | 1285.0 (65)                                    | 1253.3 | 1285.0 (64)                                    | 1253.3 | 1274.3 (73)                                   | 1242.4 |
| <b>(C)</b> BNBBCO<br>( $^1\Sigma$ )                          | CO str      | 2356.0 (2186)                                  | 2334.1 | 2294.3 (2160)                                  | 2276.4 | 2340.7 (2200)                                 | 2314.8 |
|                                                              | BN str      | 1989.0 (2095)                                  | 1986.5 | 1988.0 (2016)                                  | 1986.0 | 1987.0 (2054)                                 | 1983.8 |
|                                                              | BN str      | 1569.1 (188)                                   | 1547.2 | 1567.0 (197)                                   | 1545.8 | 1548.4 (195)                                  | 1525.1 |
|                                                              | BN str      | 1197.8 (91)                                    | /      | 1197.6 (93)                                    | /      | 1186.8 (83)                                   | /      |
| <b>(D)</b> BNCO<br>( $^1\text{A}'$ )                         | CO str      | 2306.5 (1534)                                  | 2294.3 | 2243.9 (1489)                                  | 2232.4 | 2288.2 (1563)                                 | 2274.5 |
|                                                              | BN str      | 1574.5 (261)                                   | 1576.7 | 1573.3 (249)                                   | 1575.7 | 1550.8 (247)                                  | 1552.4 |
|                                                              | BN str      | 894.0 (129)                                    | /      | 891.9 (127)                                    | /      | 878.8 (123)                                   | /      |
| <b>(E)</b> NBCO<br>( $^1\Sigma$ )                            | CO str      | 2165.6 (970)                                   | 2156.5 | 2113.9 (932)                                   | 2104.3 | 2129.5 (967)                                  | 2117.0 |
|                                                              | BN str      | 1884.7 (13)                                    | /      | 1882.8 (22)                                    | /      | 1877.0 (13)                                   | /      |

[a] Scaled frequencies using a scaling factor of 0.9661, which is obtained from the ratio of the experimental stretching frequency ( $2139\text{ cm}^{-1}$ ) and the calculated value ( $2214\text{ cm}^{-1}$ ) for CO.

**Table S5.** Comparisons between experimental and calculated vibrational frequencies and isotopic frequency ratios of products *A-E* in the reactions of  $^{11}\text{B}$  with CO in a  $^{14}\text{N}_2$  matrix.

|                                                              | Assignment  | $^{11}\text{B}+\text{CO}/^{14}\text{N}_2$ |        | $^{12}\text{C}/^{13}\text{C}$ |        | $^{16}\text{O}/^{18}\text{O}$ |        |
|--------------------------------------------------------------|-------------|-------------------------------------------|--------|-------------------------------|--------|-------------------------------|--------|
|                                                              |             | B3LYP <sup>[a]</sup>                      | Obs.   | Cal.                          | Exp.   | Cal.                          | Exp.   |
| <b>(A)</b> NNBBCO<br>( $^1\Sigma$ )                          | NN, CO sym  | 2077.4                                    | /      | 1.0034                        | /      | 1.0030                        | /      |
|                                                              | NN, CO asym | 2058.3                                    | 2047.5 | 1.0223                        | 1.0250 | 1.0139                        | 1.0146 |
|                                                              | BB str      | 1672.6                                    | 1626.7 | 1.0002                        | 1.0001 | 1.0031                        | 1.0049 |
|                                                              | BB str      | 1080.8                                    | 1113.6 | 1.0007                        | 1.0022 | 1.0077                        | 1.0063 |
| <b>(B)</b> ( $\eta^2\text{-N}_2$ )BBCO<br>( $^3\text{A}_2$ ) | CO str      | 1995.8                                    | 1997.2 | 1.0265                        | 1.0245 | 1.0159                        | 1.0137 |
|                                                              | NN str      | 1591.8                                    | /      | 1.0000                        | /      | 1.0005                        | /      |
|                                                              | BB str      | 1285.0                                    | 1253.3 | 1.0000                        | 1.0000 | 1.0084                        | 1.0088 |
| <b>(C)</b> BNBNC O<br>( $^1\Sigma$ )                         | CO str      | 2356.0                                    | 2334.1 | 1.0269                        | 1.0253 | 1.0066                        | 1.0083 |
|                                                              | BN str      | 1989.0                                    | 1986.5 | 1.0005                        | 1.0003 | 1.0010                        | 1.0014 |
|                                                              | BN str      | 1569.1                                    | 1547.2 | 1.0014                        | 1.0009 | 1.0134                        | 1.0145 |
|                                                              | BN str      | 1197.8                                    | /      | 1.0002                        | /      | 1.0093                        | /      |
| <b>(D)</b> BNCO<br>( $^1\text{A}'$ )                         | CO str      | 2306.5                                    | 2294.3 | 1.0279                        | 1.0277 | 1.0080                        | 1.0087 |
|                                                              | BN str      | 1574.5                                    | 1576.7 | 1.0008                        | 1.0006 | 1.0153                        | 1.0157 |
|                                                              | BN str      | 894.0                                     | /      | 1.0023                        |        | 1.0173                        |        |
| <b>(E)</b> NBCO<br>( $^1\Sigma$ )                            | CO str      | 2165.6                                    | 2156.5 | 1.0245                        | 1.0248 | 1.0170                        | 1.0187 |
|                                                              | BN str      | 1884.7                                    | /      | 1.0010                        | /      | 1.0041                        | /      |

[a] Scaled frequencies using a scaling factor of 0.9661, which is obtained from the ratio of the experimental stretching frequency ( $2139\text{ cm}^{-1}$ ) and the calculated value ( $2214\text{ cm}^{-1}$ ) for CO.

**Table S6.** Orbital composition analysis on the II ( $^1A'$ ) complex by Natural Atomic Orbital (NAO) method.

| Complex                                                                                     | Orbital       | Composition                                                                                                                                                                      |
|---------------------------------------------------------------------------------------------|---------------|----------------------------------------------------------------------------------------------------------------------------------------------------------------------------------|
| 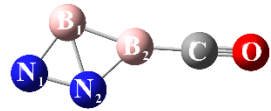 <p>II</p> | HOMO (3a'')   | $N_1\ 2p_z\ (34\%) + N_2\ 2p_z\ (3\%) + B_2\ 2p_z\ (37\%) + C\ 2p_z\ (13\%) + O\ 2p_z\ (12\%)$                                                                                   |
|                                                                                             | HOMO-1 (16a') | $N_1\ 2s\ (5\%) + 2p_x\ (4\%) + 2p_y\ (17\%) + N_2\ 2s\ (3\%) + 2p_y\ (27\%) + B_1\ 2s\ (23\%) + 2p_x\ (4\%) + 2p_y\ (10\%) + B_2\ 2p_y\ (4\%)$                                  |
|                                                                                             | HOMO-2 (15a') | $N_1\ 2s\ (5\%) + 2p_x\ (7\%) + 2p_y\ (29\%) + B_1\ 2s\ (8\%) + 2p_x\ (8\%) + 2p_y\ (9\%) + B_2\ 2s\ (7\%) + 2p_x\ (11\%) + 2p_y\ (11\%) + O\ 2p_z\ (2\%)$                       |
|                                                                                             | HOMO-3 (2a'') | $N_1\ 2s\ (15\%) + 2p_x\ (28\%) + N_2\ 2s\ (2\%) + 2p_x\ (27\%) + 2p_y\ (4\%) + B_1\ 2p_x\ (7\%) + B_2\ 2p_y\ (8\%) + N_2\ 2p_y\ (39\%) + O\ 2p_y\ (4\%)$                        |
|                                                                                             | HOMO-4 (1a'') | $N_1\ 2p_z\ (28\%) + N_2\ 2p_z\ (49\%) + B_1\ 2p_z\ (10\%) + B_2\ 2p_z\ (7\%) + O\ 2p_z\ (5\%)$                                                                                  |
|                                                                                             | HOMO-5 (14a') | $N_2\ 2p_z\ (2\%) + B_2\ 2p_z\ (3\%) + C\ 2p_z\ (30\%) + O\ 2p_z\ (63\%)$                                                                                                        |
|                                                                                             | HOMO-6 (13a') | $N_1\ 2p_x\ (1\%) + B_2\ 2p_y\ (2\%) + C\ 2p_y\ (29\%) + O\ 2p_y\ (62\%)$                                                                                                        |
|                                                                                             | HOMO-7 (12a') | $N_1\ 2p_y\ (9\%) + N_2\ 2s\ (4\%) + 2p_y\ (14\%) + B_1\ 2s\ (3\%) + B_2\ 2p_x\ (10\%) + C\ 2p_x\ (9\%) + O\ 2s\ (9\%) + 2p_x\ (37\%)$                                           |
|                                                                                             | HOMO-8 (11a') | $N_1\ 2p_x\ (4\%) + 2p_y\ (15\%) + N_2\ 2s\ (10\%) + 2p_y\ (19\%) + B_1\ 2s\ (10\%) + B_2\ 2s\ (3\%) + 2p_y\ (2\%) + C\ 2p_x\ (4\%) + O\ 2s\ (6\%) + 2p_x\ (21\%) + 2p_y\ (2\%)$ |
|                                                                                             | HOMO-9 (10a') | $N_1\ 2s\ (5\%) + N_2\ 2s\ (3\%) + B_2\ 2s\ (5\%) + 2p_x\ (19\%) + 2p_y\ (2\%) + C\ 2s\ (28\%) + 2p_x\ (15\%) + O\ 2s\ (7\%) + 2p_x\ (11\%)$                                     |
|                                                                                             | HOMO-10 (9a') | $N_1\ 2s\ (24\%) + N_2\ 2s\ (14\%) + 2p_x\ (23\%) + 2p_y\ (5\%) + B_1\ 2p_x\ (7\%) + B_2\ 2s\ (12\%) + 2p_y\ (3\%) + C\ 2s\ (4\%) + 2p_x\ (4\%)$                                 |
|                                                                                             | HOMO-11 (8a') | $N_1\ 2s\ (24\%) + 2p_x\ (10\%) + N_2\ 2s\ (35\%) + 2p_x\ (6\%) + 2p_y\ (3\%) + B_1\ 2s\ (5\%) + 2p_y\ (5\%) + B_2\ 2s\ (3\%) + 2p_x\ (3\%) + 2p_y\ (2\%)$                       |

**Table S7.** EDA-NOCV results of I1 ( $^1A'$ ) at the Hybrid/B3LYP/TZ2P level taking BBCO ( $^1A'$ ) and  $N_2$  ( $^1\Sigma_g$ ) as interacting fragments. Energy values are in kcal/mol.

| Energy terms                     | Orbital interaction                                                 | I1 ( $^1A'$ )<br>BBCO ( $^1A'$ ) + $N_2$ ( $^1\Sigma_g$ ) |
|----------------------------------|---------------------------------------------------------------------|-----------------------------------------------------------|
| $\Delta E_{\text{int}}$          |                                                                     | -114.4                                                    |
| $\Delta E_{\text{Pauli}}$        |                                                                     | 740.6                                                     |
| $\Delta E_{\text{elstat}}^{[a]}$ |                                                                     | -283.2 (33.1%)                                            |
| $\Delta E_{\text{orb}}^{[a]}$    |                                                                     | -571.8 (66.9%)                                            |
| $\Delta E_{\text{orb}}(1)^{[b]}$ | BBCO HOMO (10a') $\rightarrow$ $N_2$ LUMO ( $2\pi_g$ ) donation     | -305.5 (53.4%)                                            |
| $\Delta E_{\text{orb}}(2)^{[b]}$ | BBCO HOMO-1 (2a'') $\rightarrow$ $N_2$ LUMO ( $1\pi_g$ ) donation   | -61.6 (10.8%)                                             |
| $\Delta E_{\text{orb}}(3)^{[b]}$ | BBCO LUMO (11a') $\leftarrow$ $N_2$ HOMO-1 ( $1\pi_u$ ) donation    | -108.0 (18.9%)                                            |
| $\Delta E_{\text{orb}}(4)^{[b]}$ | BBCO LUMO+4 (14a') $\leftarrow$ $N_2$ HOMO ( $3\sigma_g$ ) donation | -50.1 (8.8%)                                              |
| $\Delta E_{\text{orb}}(5)^{[b]}$ | BBCO LUMO+1 (3a'') $\leftarrow$ $N_2$ HOMO-1 ( $2\pi_u$ ) donation  | -26.9 (4.7%)                                              |

[a] The values within the parentheses show the contribution to the total attractive interaction  $\Delta E_{\text{elstat}} + \Delta E_{\text{orb}}$ . [b] The values within parentheses show the contribution to the total orbital interaction  $\Delta E_{\text{orb}}$ .

**Table S8.** EDA-NOCV results of I1 ( $^1A'$ ) at the Hybrid/B3LYP/TZ2P level taking BBCO and N<sub>2</sub> in the different charged states as interacting fragments. Energy values are in kcal/mol.

| Energy terms                     | BBCO (S) + N <sub>2</sub> (S) | BBCO (T) + N <sub>2</sub> (T) | BBCO <sup>2+</sup> (T) + N <sub>2</sub> <sup>2-</sup> (T) | BBCO <sup>4+</sup> (S) + N <sub>2</sub> <sup>4-</sup> (S) |
|----------------------------------|-------------------------------|-------------------------------|-----------------------------------------------------------|-----------------------------------------------------------|
| $\Delta E_{\text{int}}$          | -114.4                        | -215.4                        | -871.0                                                    | -3195.3                                                   |
| $\Delta E_{\text{Pauli}}$        | 740.6                         | 1112.5                        | 692.5                                                     | 782.6                                                     |
| $\Delta E_{\text{elstat}}^{[a]}$ | -283.2 (33.1%)                | -387.4 (29.2%)                | -924.4 (59.1%)                                            | -2728.6 (68.6%)                                           |
| $\Delta E_{\text{orb}}^{[a]}$    | -571.8 (66.9%)                | -940.4 (70.8%)                | -639.1 (40.9%)                                            | -1249.3 (31.4%)                                           |
| $\Delta E_{\text{orb}}(1)^{[b]}$ | -305.5 (53.4%)                | -321.3 (34.2%)                | -184.2 (28.8%)                                            | -391.8 (31.4%)                                            |
| $\Delta E_{\text{orb}}(2)^{[b]}$ | -61.6 (10.8%)                 | -198.2 (21.1%)                | -147.9 (23.1%)                                            | -330.3 (26.4%)                                            |
| $\Delta E_{\text{orb}}(3)^{[b]}$ | -108.0 (18.9%)                | -166.7 (17.7%)                | -142.5 (22.3%)                                            | -213.8 (17.1%)                                            |
| $\Delta E_{\text{orb}}(4)^{[b]}$ | -50.1 (8.8%)                  | -143.4 (15.2%)                | -62.7 (9.8%)                                              | -108.8 (8.7%)                                             |
| $\Delta E_{\text{orb}}(5)^{[b]}$ | -26.9 (4.7%)                  | -41.7 (4.4%)                  | -56.8 (8.9%)                                              | -104.6 (8.4%)                                             |

[a] The values within the parentheses show the contribution to the total attractive interaction  $\Delta E_{\text{elstat}} + \Delta E_{\text{orb}}$ . [b] The values within parentheses show the contribution to the total orbital interaction  $\Delta E_{\text{orb}}$ .

**Table S9.** The natural charge from Natural Population Analysis (NPA) throughout the generation process of BNBBCO from NNBBCO (see Fig. 3), calculated at the B3LYP/ def2-TZVPP level.

| Natural Charge / e                                                                  | N <sub>1</sub> | N <sub>2</sub> | B <sub>1</sub> | B <sub>2</sub> | C     | O      | CO     | BB            | NN            |
|-------------------------------------------------------------------------------------|----------------|----------------|----------------|----------------|-------|--------|--------|---------------|---------------|
| NNBBCO                                                                              |                |                |                |                |       |        |        |               |               |
|    | 0.105          | -0.157         | 0.171          | -0.263         | 0.518 | -0.374 | 0.144  | <b>-0.092</b> | <b>-0.052</b> |
| $(\eta^2\text{-N}_2)\text{BBCO}$                                                    |                |                |                |                |       |        |        |               |               |
|    | -0.205         | -0.205         | 0.373          | 0.097          | 0.306 | -0.366 | -0.060 | <b>0.470</b>  | <b>-0.410</b> |
| I1                                                                                  |                |                |                |                |       |        |        |               |               |
|    | -0.464         | -0.234         | 0.660          | -0.178         | 0.571 | -0.356 | 0.215  | <b>0.482</b>  | <b>-0.698</b> |
| I2                                                                                  |                |                |                |                |       |        |        |               |               |
|    | -0.540         | -0.270         | 0.421          | 0.031          | 0.674 | -0.317 | 0.357  | <b>0.452</b>  | <b>-0.810</b> |
| I3                                                                                  |                |                |                |                |       |        |        |               |               |
|  | -0.917         | -0.219         | 0.441          | 0.408          | 0.595 | -0.307 | 0.288  | <b>0.849</b>  | <b>-1.136</b> |
| BNBNCO                                                                              |                |                |                |                |       |        |        |               |               |
|  | -1.316         | -0.811         | 0.444          | 1.179          | 0.917 | -0.414 | 0.503  | <b>1.623</b>  | <b>-2.127</b> |

**Table S10.** The natural charge from Natural Population Analysis (NPA) throughout the generation process of BNNB + N<sub>2</sub> form NNBBNN (see Fig. S15), calculated at the B3LYP/ def2-TZVPP level.

| Natural Charge / e                                                                  | N <sub>1</sub> | N <sub>2</sub> | B <sub>1</sub> | B <sub>2</sub> | N <sub>3</sub> | N <sub>4</sub> | N <sub>1</sub> N <sub>2</sub> | BB           | N <sub>3</sub> N <sub>4</sub> |
|-------------------------------------------------------------------------------------|----------------|----------------|----------------|----------------|----------------|----------------|-------------------------------|--------------|-------------------------------|
| NNBBNN                                                                              |                |                |                |                |                |                |                               |              |                               |
|    | 0.088          | -0.153         | 0.065          | 0.065          | -0.153         | 0.088          | <b>-0.065</b>                 | <b>0.130</b> | -0.065                        |
| $(\eta^2\text{-N}_2)\text{BBNN}$                                                    |                |                |                |                |                |                |                               |              |                               |
|    | -0.205         | -0.205         | 0.342          | 0.409          | -0.4           | -0.06          | <b>-0.41</b>                  | <b>0.751</b> | -0.46                         |
| I1                                                                                  |                |                |                |                |                |                |                               |              |                               |
|    | -0.514         | -0.288         | 0.619          | 0.154          | 0.099          | 0.129          | <b>-0.802</b>                 | <b>0.773</b> | 0.228                         |
| I2                                                                                  |                |                |                |                |                |                |                               |              |                               |
|   | -0.534         | -0.32          | 0.396          | 0.261          | -0.009         | 0.207          | <b>-0.854</b>                 | <b>0.657</b> | 0.198                         |
| BNNB + N <sub>2</sub>                                                               |                |                |                |                |                |                |                               |              |                               |
|  | -1.264         | -0.57          | 0.932          | 0.902          | 0              | 0              | <b>-1.834</b>                 | <b>1.834</b> | 0                             |
|  |                |                |                |                |                |                |                               |              |                               |

**Table S11.** Calculated bond orders given by the Mayer method (MBO) and Wiberg method (WBO) at the B3LYP/def2-TZVPP level.

| Complex                                        | Mayer bond order | Wiberg bond order |
|------------------------------------------------|------------------|-------------------|
| <b>NNBBCO</b>                                  |                  |                   |
| N-N                                            | 2.10             | 2.89              |
| N-B                                            | 1.29             | 1.55              |
| B-B                                            | 1.94             | 1.91              |
| B-C                                            | 1.47             | 1.54              |
| C-O                                            | 2.22             | 2.86              |
| <b>(<math>\eta^2</math>-N<sub>2</sub>)BBCO</b> |                  |                   |
| N-N                                            | 1.58             | 2.10              |
| N-B                                            | 1.10             | 1.66              |
| B-B                                            | 1.13             | 1.23              |
| B-C                                            | 1.55             | 1.58              |
| C-O                                            | 2.13             | 2.77              |
| <b>BNBNCO</b>                                  |                  |                   |
| B <sub>1</sub> -N <sub>1</sub>                 | 1.25             | 1.97              |
| N <sub>1</sub> -B <sub>2</sub>                 | 2.10             | 2.19              |
| B <sub>2</sub> -N <sub>2</sub>                 | 1.41             | 1.65              |
| N <sub>2</sub> -C                              | 1.99             | 2.21              |
| C-O                                            | 2.16             | 2.88              |
| <b>BNCO</b>                                    |                  |                   |
| B-N                                            | 1.18             | 1.95              |
| N-C                                            | 1.98             | 2.20              |
| C-O                                            | 2.18             | 2.90              |
| <b>NBCO</b>                                    |                  |                   |
| N-B                                            | 2.63             | 2.95              |
| B-C                                            | 1.24             | 1.46              |
| C-O                                            | 2.35             | 2.97              |



**Table S12.** Orbital composition analysis on the BNBNCNCO complex by Natural Atomic Orbital (NAO) method.

| Complex                                                                                       | Orbital | Composition                                                                                                     |
|-----------------------------------------------------------------------------------------------|---------|-----------------------------------------------------------------------------------------------------------------|
| BNBNCNCO<br>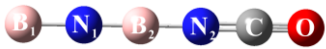 | HOMO    | $B_1\ 2s\ (71\%) + 2p_z\ (24\%) + N_1\ 2s\ (3\%) + 2p_z\ (2\%)$                                                 |
|                                                                                               | HOMO-1  | $B_1\ 2p_x\ (5\%) + N_1\ 2p_x\ (64\%) + B_2\ 2p_x\ (5\%) + N_2\ 2p_x\ (15\%) + C\ 2p_x\ (1\%) + O\ 2p_x\ (9\%)$ |
|                                                                                               | HOMO-2  | $B_1\ 2p_y\ (5\%) + N_1\ 2p_y\ (64\%) + B_2\ 2p_y\ (5\%) + N_2\ 2p_y\ (15\%) + C\ 2p_y\ (1\%) + O\ 2p_y\ (9\%)$ |
|                                                                                               | HOMO-3  | $B_1\ 2p_y\ (1\%) + N_1\ 2p_y\ (14\%) + B_2\ 2p_y\ (14\%) + N_2\ 2p_y\ (39\%) + O\ 2p_y\ (31\%)$                |
|                                                                                               | HOMO-4  | $B_1\ 2p_x\ (1\%) + N_1\ 2p_x\ (14\%) + B_2\ 2p_x\ (14\%) + N_2\ 2p_x\ (39\%) + O\ 2p_x\ (31\%)$                |
|                                                                                               | HOMO-5  | $B_2\ 2p_x\ (1\%) + N_2\ 2p_x\ (23\%) + C\ 2p_x\ (37\%) + O\ 2p_x\ (38\%)$                                      |
|                                                                                               | HOMO-6  | $B_2\ 2p_y\ (1\%) + N_2\ 2p_y\ (23\%) + C\ 2p_y\ (37\%) + O\ 2p_y\ (38\%)$                                      |

**Table S13.** EDA-NOCV results of BNB<sub>2</sub>CO (<sup>1</sup>Σ) at the Hybrid/B3LYP/TZ2P level taking [BNB<sup>+</sup>] (<sup>1</sup>Σ) and [NCO<sup>-</sup>] (<sup>1</sup>Σ) as interacting fragments. Energy values are in kcal/mol.

| Energy terms                     | Orbital interaction                                      | BNB <sub>2</sub> CO ( <sup>1</sup> Σ)<br>[BNB <sup>+</sup> ] ( <sup>1</sup> Σ) + [NCO <sup>-</sup> ] ( <sup>1</sup> Σ) |
|----------------------------------|----------------------------------------------------------|------------------------------------------------------------------------------------------------------------------------|
| $\Delta E_{\text{int}}$          |                                                          | -304.4                                                                                                                 |
| $\Delta E_{\text{Pauli}}$        |                                                          | 337.1                                                                                                                  |
| $\Delta E_{\text{elstat}}^{[a]}$ |                                                          | -326.8 (50.9%)                                                                                                         |
| $\Delta E_{\text{orb}}^{[a]}$    |                                                          | -314.8 (49.1%)                                                                                                         |
| $\Delta E_{\text{orb}}(1)^{[b]}$ | [BNB <sup>+</sup> ] 7σ ← [NCO <sup>-</sup> ] 7σ donation | -167.1 (53.1%)                                                                                                         |
| $\Delta E_{\text{orb}}(2)^{[b]}$ | [BNB <sup>+</sup> ] 2π ← [NCO <sup>-</sup> ] 2π donation | -45.2 (14.4%)                                                                                                          |
| $\Delta E_{\text{orb}}(3)^{[b]}$ | [BNB <sup>+</sup> ] 2π ← [NCO <sup>-</sup> ] 2π donation | -45.1 (14.3%)                                                                                                          |
| $\Delta E_{\text{orb}}(4)^{[b]}$ | [BNB <sup>+</sup> ] 7σ ← [NCO <sup>-</sup> ] 7σ donation | -50.2 (15.9%)                                                                                                          |

[a] The values within the parentheses show the contribution to the total attractive interaction  $\Delta E_{\text{elstat}} + \Delta E_{\text{orb}}$ . [b] The values within parentheses show the contribution to the total orbital interaction  $\Delta E_{\text{orb}}$ .

**Table S14.** Experimental frequencies [cm<sup>-1</sup>] of boron carbonyl compounds observed in a N<sub>2</sub> matrix.

| Complex                              | CO     | <sup>13</sup> CO | C <sup>18</sup> O |
|--------------------------------------|--------|------------------|-------------------|
| OC <sup>10</sup> BCO                 | 2017.9 | 1972.2           | 1992.8            |
| OC <sup>11</sup> BCO                 | 2001.1 | 1956.3           | 1972.6            |
| OC <sup>10</sup> B <sup>10</sup> BCO | 2028.9 | 1978.4           | 2005.5            |
| OC <sup>11</sup> B <sup>11</sup> BCO | 2027.3 | 1976.8           | 1990.3            |

**Table S15.** Experimental frequencies [ $\text{cm}^{-1}$ ] of boron nitrides observed in a  $\text{N}_2$  matrix.

| <b>Complex</b>                       | <b><math>^{14}\text{N}_2</math></b> | <b><math>^{15}\text{N}_2</math></b> |
|--------------------------------------|-------------------------------------|-------------------------------------|
| $\text{N}^{10}\text{BN}$             | 1644.7, 1637.7, 1570.7              | 1630.5, 1623.5, 1557.3              |
| $\text{N}^{11}\text{BN}$             | 1590.1, 1518.7                      | 1575.7, 1504.5                      |
| $^{10}\text{BN}^{10}\text{BN}$       | 2014.2, 2006.6, 2004.2              | 1982.6, 1974.8, 1972.5              |
| $^{11}\text{BN}^{11}\text{BN}$       | 1960.4, 1958.1                      | 1927.5, 1925.2                      |
| $\text{N}^{10}\text{BNN}$            | 2127.5, 2124.1, 1864.9, 1863.3      | 2057.4, 2054.2, 1845.6              |
| $\text{N}^{11}\text{BNN}$            | 2127.5, 2124.1, 1807.3, 1805.8      | 2057.4, 2054.2, 1787.2, 1785.9      |
| $\text{NN}^{10}\text{BNN}$           | 1988.6, 1819.5, 1231.4              | 1923.1, 1763.3, 1223.5              |
| $\text{NN}^{11}\text{BNN}$           | 1988.6, 1819.5, 1186.8              | 1923.1, 1763.3, 1181.1              |
| $\text{NN}^{10}\text{B}_2\text{NN}$  | 1933.0, 1180.5                      | 1871.0, 1169.4                      |
| $\text{NN}^{11}\text{B}_2\text{NN}$  | 1931.4, 1151.5                      | 1868.7, 1139.8                      |
| $\text{NN}^{10}\text{B}_3\text{N}_2$ | 1922.7, 1544.4                      | 1860.2, 1540.9                      |
| $\text{NN}^{11}\text{B}_3\text{N}_2$ | 1921.7, 1480.0                      | 1859.2, 1476.7                      |
| $\text{NN}^{10}\text{B}_4\text{NN}$  | 1937.0, 1189.6                      | 1874.7, 1177.9                      |
| $\text{NN}^{11}\text{B}_4\text{NN}$  | 1935.4, 1142.6                      | 1872.7, 1131.0                      |

**Table S16.** Experimental frequencies [ $\text{cm}^{-1}$ ] of the products of boron atom react with CO and  $\text{N}_2$  in a  $\text{N}_2$  matrix.

| Complex                       | CO/ $\text{N}_2$       | $^{13}\text{CO}/\text{N}_2$ | $\text{C}^{18}\text{O}/\text{N}_2$ | CO/ $^{15}\text{N}_2$  |
|-------------------------------|------------------------|-----------------------------|------------------------------------|------------------------|
| NN $^{10}\text{BCO}$          | 2041.9, 1896.0         | 1957.1, 1890.8              | 2023.6, 1894.2                     | 2030.4, 1854.5, 1830.1 |
| NN $^{11}\text{BCO}$          | 2036.4, 1889.7         | 1940.7, 1879.4              | 2002.9, 1882.6                     | /                      |
| $\text{N}_2^{10}\text{BCO}$   | 2079.0, 1597.1, 1181.3 | 2030.2, 1588.3, 1181.0      | 2050.1, 1592.3, 1177.0             | 2075.0, 1567.0, 1163.2 |
| $\text{N}_2^{11}\text{BCO}$   | 2071.1, 1577.9, 1157.1 | 2022.1, 1576.8, 1154.7      | 2042.2, 1571.9, 1150.2             | /                      |
| N $^{10}\text{BNCO}$          | 2315.5                 | 2254.3                      | 2297.1                             | 2306.8                 |
| N $^{11}\text{BNCO}$          | 2314.8                 | 2253.5                      | 2297.2                             | /                      |
| $^{10}\text{B}(\text{NCO})_2$ | 2261.6                 | 2210.5                      | 2244.8                             | 2252.6                 |
| $^{11}\text{B}(\text{NCO})_2$ | 2260.5                 | 2198.7                      | 2243.2                             | /                      |

**Table S17.** Observed and calculated (at the B3LYP/def2-TZVPP and CCSD(T)/cc-pVDZ levels) infrared absorptions ( $\text{cm}^{-1}$ ) for products **A-C** in the reactions of  $^{11}\text{B}$  with CO in a  $\text{N}_2$  matrix.

|                                        | Assignment  | B3LYP/def2-TZVPP <sup>[a]</sup> | CCSD(T)/cc-pVDZ <sup>[b]</sup> | Obs.   |
|----------------------------------------|-------------|---------------------------------|--------------------------------|--------|
| <b>(A)</b> NNBBCO                      | NN, CO sym  | 2077.4                          | 2082.2                         | /      |
|                                        | NN, CO asym | 2058.3                          | 1967.4                         | 2047.5 |
|                                        | BB str      | 1672.6                          | 1631.9                         | 1626.7 |
|                                        | BB str      | 1080.8                          | 1096.4                         | 1113.6 |
| <b>(B)</b> ( $\eta^2\text{-N}_2$ )BBCO | CO str      | 1995.8                          | 2052.2                         | 1997.2 |
|                                        | NN str      | 1591.8                          | 1582.1                         | /      |
|                                        | BB str      | 1285.0                          | 1295.9                         | 1253.3 |
| <b>(C)</b> BNBNC O                     | CO str      | 2356.0                          | 2427.7                         | 2334.1 |
|                                        | BN str      | 1989.0                          | 2036.7                         | 1986.5 |
|                                        | BN str      | 1569.1                          | 1586.5                         | 1547.2 |
|                                        | BN str      | 1197.8                          | 1191.5                         | /      |

[a] Scaled frequencies using a scaling factor of 0.9661, which is obtained from the ratio of the experimental stretching frequency ( $2139\text{ cm}^{-1}$ ) and the calculated value ( $2214\text{ cm}^{-1}$ ) for CO. [b] Scaled frequencies using a scaling factor of 0.9977, which is obtained from the ratio of the experimental stretching frequency ( $2139\text{ cm}^{-1}$ ) and the calculated value ( $2144\text{ cm}^{-1}$ ) for CO.
